# 1           **Comparison of dsDNA and ssDNA-based NGS library** 2           **construction methods for targeted genome and methylation** 3                           **profiling of cfDNA**

4  
5   Jianchao Zheng<sup>1,2</sup>, Zhilong Li<sup>1,2</sup>, Xiuqing Zhang<sup>1,3</sup>, Hongyun Zhang<sup>2</sup>, Shida Zhu<sup>2,4</sup>,  
6   Jianlong Sun<sup>2†</sup>, and Yuying Wang<sup>2†</sup>

7  
8   <sup>1</sup>College of Life Sciences, University of Chinese Academy of Sciences, Beijing  
9   100049 , China.

10   <sup>2</sup>BGI Genomics, BGI-Shenzhen, Shenzhen 518083, China.

11   <sup>3</sup>BGI-Shenzhen, Shenzhen 518083, China.

12   <sup>4</sup>Shenzhen Engineering Laboratory for Innovative Molecular Diagnostics,  
13   BGI-Shenzhen, Shenzhen, 518120, China

14  
15   <sup>†</sup>Correspondence

16   Dr. Jianlong Sun and Dr. Yuying Wang, BGI Genomics, BGI-Shenzhen, Shenzhen  
17   518083, China. E-mail: sunjianlong@genomics.cn and wangyuying@genomics.cn

## 18 19   **Grants**

20   This research was supported by Shenzhen Engineering Laboratory for Innovative  
21   Molecular Diagnostics (DRC-SZ[2016]884).

# 1     **Conflict of Interest Statement**

2     JZ, ZL, HZ, SZ, JS, and YW are employees of BGI Genomics, BGI-Shenzhen. XZ is  
3     an employee of BGI-Shenzhen.

# 5     **Abstract**

6     Cell-free DNA (cfDNA) profiling by next generation sequencing (NGS) has wide  
7     applications in cancer diagnosis, prognosis, and therapy response monitoring. One  
8     key step of cfDNA deep sequencing workflow is NGS library construction, whose  
9     efficiency determines effective sequencing depth, sequencing quality, and accuracy. In  
10    this study, we compared two different cfDNA library construction methods for the  
11    applications of mutation detection and methylation profiling: the conventional method  
12    which captures double-stranded DNA (dsDNA) molecules, namely the dsLib  
13    workflow, and an alternative method which captures single-stranded DNA (ssDNA),  
14    namely the ssLib workflow. Our results suggest that the dsLib method was preferable  
15    for mutation detection while the ssLib method proved more efficient for methylation  
16    analysis. Our findings could help researchers choose more appropriate library  
17    construction method for corresponding downstream sequencing applications.

18

19    **Keywords:** cfDNA, NGS, library construction methods, target sequencing,  
20    methylation.

21

# 1     **Introduction**

2     Cell-free DNA (cfDNA), primarily derived from cell apoptosis, has been shown to be  
3     an important biomarker of many physiological and pathological conditions such as  
4     autoimmunity, infection, pregnancy, exercise, transplantation, and cancer [1-3]. It is  
5     detectable in almost all body fluids including plasma, serum, and urine, with a peak  
6     size at approximately 166 bp [4, 5]. In cancer patients, there is a subset of cfDNA  
7     known as circulating tumor DNA (ctDNA), which originates from tumor cells and  
8     carries genetic and epigenetic characteristics of the tumor [6, 7]. cfDNA has a short  
9     half-life in circulation (reported to be between 16 and 150 minutes), can be repeatedly  
10    sampled, and may potentially overcome intratumor heterogeneity compared to tissue  
11    biopsies [8]. These unique characteristics make cfDNA-based liquid biopsy an ideal  
12    approach for cancer diagnosis, prognosis, and therapy response monitoring [9, 10].  
13    However, due to low concentration of cfDNA in plasma (~3 ng/ml in healthy  
14    individuals) and very small fraction of ctDNA among abundant cfDNA that derived  
15    from blood cells and normal tissues, accurate detection of ctDNA remains a  
16    challenging task [11, 12].

17  
18    Massively parallel sequencing (MPS), also known as next generation sequencing  
19    (NGS), has been widely applied in both research and diagnostic fields [13, 14].  
20    Millions of DNA fragments can be simultaneously sequenced and analyzed by NGS  
21    [15]. Furthermore, targeted capture sequencing allows for deeper sequencing for  
22    target regions of interest at a lower cost [16]. Remarkably, efficient library

1 construction before targeted capture sequencing determines effective sequencing  
2 depth and remains indispensable to successful sequencing of the target regions, and is  
3 particularly critical for sequencing of limited amount of cfDNA, and for identification  
4 of variants with lower allele fractions [9, 17]. During library construction,  
5 platform-specific adapters, which contain sample barcode sequence(s) and common  
6 primer binding sites for subsequent amplification and sequencing, are ligated to both  
7 ends of the original DNA fragments [18]. Various library construction methods have  
8 been introduced, aiming to improve DNA conversion efficiency (defined as the  
9 fraction of original DNA molecules that are successfully converted to the final library)  
10 [19-23]. Conventional double-stranded library (dsLib) construction workflow (such as  
11 what is used in the KAPA Hyper Prep kit) consists of following steps: (i) end repair  
12 and dA-tailing of the double-stranded (dsDNA) templates; (ii) adapter ligation; (iii)  
13 library amplification and purification [24]. On the other hand, single-stranded library  
14 (ssLib) construction was usually initialized by adapter ligation to single-stranded  
15 DNA (ssDNA) templates and followed by library amplification and purification [19,  
16 22, 25]. The ssLib construction method was originally developed to recover ancient  
17 and/or degraded DNA fragments which are usually poorly captured by conventional  
18 dsDNA-based library preparation [26, 27]. Previously, researchers have compared  
19 their performance in applications such as non-invasive prenatal testing (NIPT), which  
20 is based on shallow whole-genome sequencing (WGS), and found no advantage for  
21 ssDNA-based methodology [28]. However, there hasn't been systematic study to  
22 compare the performance of these two methods when used for cfDNA sequencing for

1 cancer-related applications.

2

3 In this study, we compared the dsLib workflow and ssLib workflow for targeted deep  
4 sequencing (for variant detection) and methylation sequencing (for detection of  
5 cytosine methylation, an important form of epigenomic modification) of cfDNA, two  
6 applications important for cancer diagnosis. We found that, for targeted deep  
7 sequencing, the dsLib method achieved overall better performance and satisfactory  
8 limit of detection (LOD). For methylation sequencing, we compared the dsLib and  
9 ssLib workflow coupled with either bisulfite-based or enzyme-based cytosine  
10 conversion methods, and found that ssLib coupled with bisulfite conversion showed  
11 notably better performance.

12

## 13 **Materials and Methods**

### 14 **Ethical Compliance**

15 This study was approved by the institutional review board of BGI (NO. BGI-IRB:  
16 19077).

17

### 18 **Sample collection and cfDNA isolation**

19 After obtaining informed consent, blood samples were collected from 37 healthy  
20 volunteers and 2 lung cancer patients in 10 mL K2 EDTA BD Vacutainer tubes. Blood  
21 was separated immediately by an initial centrifugation at  $1,600 \times g$  for 10 min and then  
22 by a second centrifugation at  $16,000 \times g$  for 10 min. Plasma were pooled and split into

1 4ml per reaction for cfDNA isolation using MagPure Circulating DNA Maxi Kit  
2 (Magen, China) per manufacturer's instruction. Extracted cfDNA samples from  
3 healthy volunteers were pooled together to obtain sufficient homogeneous material for  
4 subsequent analysis. cfDNA was quantitated by Qubit dsDNA High Sensitivity Kit  
5 (Thermo Fisher Scientific, USA). The 1% Multiplex I cfDNA reference standards  
6 HD778 (Horizon Discovery, UK) were spiked into healthy donor cfDNA at 0.1%,  
7 0.25%, or 0.5% to simulate cfDNA samples with defined mutant allele frequencies  
8 (MAFs). Experiments were performed in triplicates.

9

#### 10 **Double-stranded cfDNA library construction**

11 Duplex unique molecular identifier (UMI) adapters for MGISEQ-2000 sequencer  
12 were designed according to principles described by Newman et al [21] with the  
13 modification that 3-bp UMIs were chosen instead of 2-bp UMIs in order to  
14 accommodate a higher library complexity. To avoid potential issues during  
15 sequencing caused by low complexity at the T-A ligation position (constant base), 32  
16 pairs of UMI adapters were incorporated with an additional base (G or C) before the  
17 T-A ligation position. Long oligonucleotides UMIxxL (5'-  
18 Phosphorylation-[C/G/-]-NNNAAGTCGGAGGCCAAGCGGTCTTAGGAAGACAA  
19 -3') and short oligonucleotides UMIxxS  
20 (5'-GACATGGCTACGATCCGACTNNN-[G/C/-]-T-3') were synthesized by BGI  
21 tech solutions (Beijing Liuhe co.limited). Each oligo was dissolved to 100 µM using  
22 TE buffer. For each pair of adapters, 5 µL UMIxxL and 5 µL UMIxxS oligos (100 µM)

1 were combined and brought up to 20  $\mu$ L with TE buffer. Oligos were annealed for  
2 more than 30 minutes at room temperature. 64 UMI adapters (25  $\mu$ M) were mixed and  
3 diluted to 5  $\mu$ M, marked as UMI64M.  
4  
5 Double-stranded cfDNA libraries were prepared either by KAPA Hyper Prep kit  
6 (Kapa Biosystems, cat. No. KK8504) per manufacturer's instruction or our custom  
7 library construction protocol. For the latter, briefly, 1-10 ng cfDNA was mixed with  
8 end-repair master mix consisting of T4 DNA polymerase (Enzymatics, cat. No.  
9 P7080L), T4 polynucleotide kinase (Enzymatics, cat. No. Y9040L), rtaq DNA  
10 polymerase (MGI, cat. No. 01E012MM), dNTP, and T4 DNA ligase buffer, and kept  
11 at 20 $^{\circ}$ C for 30 min followed by 65 $^{\circ}$ C for 30 min. Then UMI64M adapter was added to  
12 the end-repair reaction product and mixed by pipetting, followed by adding ligation  
13 master mix consisting of golden T4 DNA ligase (MGI, cat. No. 02E004MM), 10 $\times$  T4  
14 DNA ligase buffer, and PEG6000 (Sigma Aldrich, 50%). The ligation reaction was  
15 incubated at 16 $^{\circ}$ C for 60 min. Adapter ligated DNA was purified using Agencourt  
16 AMPure XP beads. Next, index PCR was then performed and purified using  
17 Agencourt AMPure XP beads. The concentration of final library was determined by  
18 Qubit dsDNA High Sensitivity Kit.  
19  
20 Double-stranded cfDNA methylation sequencing libraries were prepared according to  
21 above library preparation workflow with following modifications: (i) 0.05 ng  
22 fragmented lambda DNA was spiked into the 10 ng cfDNA to monitor bisulfite

conversion rate; (ii) all cytosines of adapter were methylated; (iii) after purification of the ligation product, bisulfite conversion was performed using EZ DNA Methylation Gold kit (Zymo Research, cat. No. D5006) or EM-seq Conversion Module (NEB, cat. No. E7125); (iv) index PCR was performed by 2×Golden U+ High-fidelity Readymix (MGI, cat. No. 01K01701MM).

### **Single-stranded cfDNA library construction**

The single-stranded library preparation method was based on the ssDNA2.0 method [19] with the modification that T-A ligation was used to further improve ligation efficiency. Briefly, MyOne C1 beads carrying the extension product were resuspended in the A-tailing reaction mix consisting of Klenow (3'-5' exo-) (Enzymatics, cat. No. P7010-LC-L), 10× blue buffer, and dATP, and incubated at 37°C for 30 min then at 75°C for another 30min. The libraries were amplified by a specific number of PCR cycles based on cfDNA input amount, purified by Agencourt AMPure XP beads, and eluted in nuclease-free water.

Single-stranded cfDNA methylation sequencing libraries were prepared as above after input cfDNA was converted using either the EZ DNA Methylation Gold kit (Zymo Research, cat. No. D5006) or the EM-seq Conversion Module (NEB, cat. No. E7125). To monitor the conversion rate, 0.05 ng fragmented lambda DNA was spiked into 10 ng cfDNA.



## 1     **Target capture and sequencing**

2     A custom capture panel that spans 220 kb and covers 139 cancer driver genes was  
3     designed and synthesized by IDT technologies as previously described [29]. Targeted  
4     genome capture was performed using xGen® Lockdown® Reagents (IDT  
5     technologies) and BGI adapter-specific blockers (BGI). 6 or 8 Libraries were pooled  
6     (400ng each) and captured per manufacturer’s instruction.

7  
8     Targeted methylation capture was performed using a custom-designed 198kb panel of  
9     TargetCap methylation probes and reagents (BoKe Bioscience China, cat. No.  
10    MP121CD) and BGI adapter-specific blockers (BGI). 6 or 8 Libraries were pooled  
11    (400ng each) and captured per manufacturer’s instruction.

12  
13    The above captured cfDNA genome or methylation libraries were amplified and  
14    purified with AMPure XP beads. Library concentration was determined by Qubit  
15    dsDNA High Sensitivity Kit.

16  
17    Captured libraries were sequenced on MGISEQ-2000 sequencer (MGI, China) using  
18    the 2 × 100 paired-end sequencing method per manufacturer’s instruction.

## 19 20    **Preparation of two-human cfDNA blend sample**

21    White blood cells from the two donors were first sequenced to determine genotypes.  
22    11 heterozygous from the “spike-in” donor and 58 homozygous single nucleotide

polymorphisms (SNPs) shared by the two donors covered by the IDT target capture panel were then selected to measure the sensitivity and specificity of variant detection, respectively. cfDNA samples of the two donors were mixed at a ratio of 1:200 to simulate cfDNA with a 0.25% “spike-in” variant allele frequencies (VAFs) using the heterozygous SNPs from the “spike-in” donor. Experiments were performed in duplicates.

## **Data analysis**

Adapter trimming and quality control of sequencing data were performed using Fastp (v0.19.7) [30]. Paired-end reads of targeted sequencing and targeted methylation sequencing were aligned to the hg19 reference human genome using bwa (v0.7.17) and BitMapperBS (v1.0.0.8), respectively [31, 32]. Duplications were marked and reads were deduplicated using sambamba (v0.6.8) [33]. Removal of sequencing errors using duplex UMIs and variant calling were performed using custom python scripts. Methylation rates of cytosines were calculated as  $\#C/(\#C+\#T)$  for each CpG site with at least 4x coverage, and M-bias of sequence reads was analyzed using MethylDackel (v0.3.0) (<https://github.com/dpryan79/MethylDackel>). The cytosine conversion rate was calculated using the methylation ratio of the spiked-in lambda DNA. GC-bias metrics were analyzed using Picard Tools (v 2.10.10) (<http://broadinstitute.github.io/picard>). Insert size distribution, base distribution of reads, on-target rate, and sequencing depth were analyzed using custom Perl scripts.

## 1     **Data Access**

2     The data that support the findings of this study have been deposited in the CNSA  
3     (<https://db.cngb.org/cnsa/>) of CNGBdb with accession number CNP0001331.

## 5     **Results**

### 6     **Comparison of dsLib vs. ssLib method for targeted deep sequencing of cfDNA**

7     We first compared double-stranded library (dsLib) preparation and single-stranded  
8     library (ssLib) preparation methods for cfDNA mutation detection using deep  
9     sequencing (Figure 1A, see Methods for more details). KAPA Hyper Prep kit, a  
10    widely used NGS library construction kit which is based on the conventional dsDNA  
11    library preparation methodology, was also included as a reference to evaluate  
12    performance of our self-developed dsLib workflow. Duplex unique molecular  
13    identifier (UMI)-based adapters were used to reduce noises that may derive from PCR  
14    and/or sequencing errors [21] (see Methods for more details). Since in clinical  
15    practice the amount of extracted cfDNA was often limited and highly variable [34],  
16    we used 1 ng, 5 ng, and 10 ng cfDNA as inputs for library construction respectively  
17    (Supplementary Table 1). Prepared libraries underwent hybridization-based target  
18    enrichment procedure and captured libraries were sequenced to > 20000x raw average  
19    depth (see Methods for more details). Results showed that library yields were similar  
20    between dsLib and ssLib workflow (Supplementary Figure 1A). The two workflows  
21    also achieved similar deduplicated depths (Figure 1B and Supplementary Table 1). Yet,  
22    the ssLib workflow was more complicated and time-consuming than the dsLib

1 method (8h vs 3.5h, see Methods for more details). Remarkably, our self-developed  
2 dsLib protocol showed significantly better performance than the commercial KAPA  
3 workflow (Figure 1B and Supplementary Figure 1).  
4  
5 To further validate its ability to detect low abundance mutations in cfDNA and  
6 confirm the limitation of detection (LOD), we applied our dsLib workflow on 40 ng  
7 cfDNA spiked-in with cfDNA reference standards, simulating cfDNA samples with  
8 defined variant allele frequencies (VAFs) (0.1%, 0.25%, and 0.5%, see Methods for  
9 more details). 100% (24/24), 100% (24/24), 95.8% (23/24), and 91.7% (22/24)  
10 mutations were detected in cfDNA samples with 1%, 0.5%, 0.25% and 0.1% expected  
11 VAFs respectively, showing good correlation between the measured and expected  
12 VAFs (Figure 1C). The analytical performance of our assay was also evaluated using  
13 two-human cfDNA blend samples (see Methods for more details) to more closely  
14 mimic cfDNA carrying low VAF mutations. Briefly, single nucleotide polymorphism  
15 (SNP) sites where the “spike-in” donor carries heterozygous alleles while the  
16 “background” donor carries homozygous alleles were used to evaluate assay  
17 sensitivity; SNP sites where the “spike-in” donor and “background” donor carry the  
18 same homozygous alleles were used to evaluate assay specificity. We obtained a  
19 sensitivity of 95.5% (21/22 SNPs evaluated) and a specificity of 99.1% (115/116  
20 SNPs evaluated) using the UMI error correction. Sensitivity was slightly lower  
21 (86.4%; 19/22 SNPs evaluated) if only variants supported by at least one duplex UMI  
22 family are considered true variants, while specificity was further improved to 100%

1 (116/116) (Supplementary Table 2). The results indicated that our custom dsLib  
2 workflow provides satisfactory sensitivity for detection of low abundance variants in  
3 cfDNA.

4  
5 ctDNA has been proven to be shorter than cfDNA originated from normal cells [35,  
6 36]. Theoretically, the ssLib workflow preferentially enriches short DNA molecules  
7 and therefore may enrich ctDNA and improve its detection [28]. Copy number  
8 variation (CNV) is a hallmark of cancer and could be used as a biomarker for ctDNA  
9 [37]. Here, we compared CNV detectability of plasma cfDNA from lung cancer  
10 patients using either dsLib or ssLib workflow to test the hypothesis that ssLib may  
11 enrich for shorter ctDNA. We found no significant difference in CNV detection by  
12 ssLib workflow *vs.* dsLib (Figure 1D), consistent with previous study which showed  
13 that ssDNA-based workflow did not enrich for fetal DNA for NIPT, despite the  
14 finding that it did enrich for shorter cfDNA fragments [38]. Taken together, our results  
15 suggest that dsLib workflow is more preferable for ctDNA mutation detection.

16

## 17 **Comparison of dsLib *vs.* ssLib for cfDNA methylation sequencing**

18 Bisulfite sequencing has been a widely used sequencing technology for methylation  
19 profiling, where methylation status of cytosines could be determined at  
20 single-nucleotide resolution. This technology leverages the fact that methylated  
21 cytosine remains unaffected when treated with sodium bisulfite, whereas  
22 unmethylated cytosine is converted to uracil [39].

1  
2 To compare performance of the single-stranded methylation sequencing library  
3 construction (ssmLib) and the double-stranded methylation sequencing library  
4 construction (dsmLib) (Figure 2A), we applied these two workflows on 1 ng, 5 ng,  
5 and 10 ng cfDNA as inputs and captured the libraries with a 198 kb methylation  
6 capture panel (Supplementary Table 3). Sequencing results showed that ssmLib  
7 produced significantly higher library yields and deduplicated depths than dsmLib; the  
8 on-target rates were also slightly higher in ssmLib libraries than dsmLib libraries  
9 (Figure 2 B-C and Supplementary Figure 2). Notably, libraries produced by ssmLib  
10 had more short insert fragments than those produced by dsmLib (Figure 2D). These  
11 results can be attributed to DNA degradation caused by the bisulfite conversion  
12 process, which involves high temperature and low pH conditions [40]: during ssmLib  
13 workflow, the resulted short cfDNA fragments can still be captured by the  
14 ssDNA-based adapter ligation; on the other hand, during dsmLib workflow, since  
15 bisulfite was applied to the adapter-ligated dsDNA, excessive damage of the  
16 templates will cause the libraries to lack paired adapters and lost during subsequent  
17 amplification, resulting in much lower library yields and effective sequencing depths.  
18 For measurements of CpG site methylation level, technical replicates showed good  
19 correlation for both methods (Supplementary Figure 3) with various DNA input  
20 amounts (Figure 2E).

21  
22 Methylation bias (M-bias) is the term describing measured methylation levels that

deviate from true values, often observed near the 3' end of sequenced fragments due to unmethylated cytosines introduced by the end-repair step during dsDNA-based library preparation [41, 42]. Theoretically, libraries produced by ssmLib may show less to no M-bias since there is no end-repair step involved (Figure 2A). Indeed, we observed severe M-bias in Read 2 of dsmLib libraries, but not in ssmLib libraries (Figure 2F). Taken together, these results suggest that ssmLib method is more preferable for the application of cfDNA methylation sequencing.

Recently, several enzyme-based cytosine conversion methods have been developed as gentler substitutes for bisulfite conversion [43, 44]. We also compared performance of a novel enzyme-based workflow (the NEB EM-seq Conversion Module) with the conventional bisulfite conversion workflow (using the widely used ZYMO EZ DNA Methylation Gold kit) (Figure 3A). EM-seq conversion module uses a two-step enzymatic conversion process to detect modified cytosines: the first step uses TET2 and an oxidation enhancer to protect modified cytosines from downstream deamination while converting 5-methylcytosine (5mC) to 5-carboxycytosine (5caC). The second step uses APOBEC to enzymatically deaminate cytosine but does not convert 5caC (the original 5mC). As expected, the ssmLib libraries produced by bisulfite conversion had more short insert fragments than those produced by enzyme-based conversion. Meanwhile, with ssmLib workflow, the bisulfite conversion method generated significantly higher library yields and deduplicated depths than enzymatic conversion, while similar cytosine conversion efficiencies were

1 observed for the two methods (Figure 3C-E and Supplementary Table 3). For dsMLib  
2 workflow, however, there was no significant difference in either library yields,  
3 deduplicated depths, or fragment size distributions between the two conversion  
4 methods (Figure 3B, Supplementary Figure 4 and Supplementary Table 3). Among all,  
5 bisulfite conversion coupled with ssMLib workflow still achieved the highest  
6 deduplicated sequencing depth. Also, the enzymatic conversion is more  
7 time-consuming (8h vs 3.5h) than the bisulfite conversion. Taken together, our results  
8 favor bisulfite conversion coupled with ssLib workflow for cfDNA methylation  
9 sequencing.

10

## 11 **Conclusion**

12 The double-stranded library preparation method is more advantageous for ctDNA  
13 mutation detection thanks to the higher data quality and easy workflow. Meanwhile,  
14 bisulfite conversion coupled with single-stranded library preparation showed overall  
15 better performance for cfDNA methylation sequencing. Our results suggest that when  
16 performing high-throughput sequencing for cfDNA, depending on the downstream  
17 applications, these two library preparation methods should be chosen accordingly.

18

## 19 **Discussion**

20 In recent decades, thanks to the development of NGS technology, the cost of  
21 high-throughput DNA sequencing had dropped dramatically, making it affordable for  
22 researchers worldwide [45]. Library construction is a key step for successful NGS



1 workflow and high-quality data generation. In this study, we compared dsDNA and  
2 ssDNA-based library construction methods for cfDNA deep sequencing (i.e., for  
3 ctDNA variant detection) and methylation profiling.  
4  
5 A major difference between dsDNA and ssDNA based cfDNA library construction  
6 methods is that cfDNA molecules harboring single-strand breaks (also called nicks) as  
7 well as those existing as ssDNA form could be utilized by the ssLib (or ssmLib)  
8 workflow but would not be ligatable when using the dsLib (or dsmLib) workflow  
9 (Figure 1A and 2A). Naturally nicked and/or single-stranded cfDNA molecules may  
10 only be a very small fraction hence this difference would be expected to be small and  
11 may not cause significant impact on the effective sequencing depth. Indeed, we  
12 observed similar deduplicated depth for cfDNA libraries generated using ssLib or  
13 dsLib workflow (Supplementary Figure 1B); in fact, deduplicated depth of ssLib  
14 libraries were even slightly inferior than dsLib, possibly due to the fact that ssLib  
15 workflow is lengthier and requires more beads purification and therefore may cause  
16 template loss.  
17  
18 Using detected CNV level as an indicator of ctDNA fraction, we also showed that  
19 there was no significant enrichment of ctDNA by ssLib compared to dsLib workflow  
20 (Figure 1D), consist with previous research conducted in the setting of NIPT which  
21 showed that ssLib workflow does not enrich for shorter fetal DNA [28, 38]. It was  
22 suggested that intrinsic biological differences between fetal DNA and maternal DNA  
23 molecules might account for the failure of ssDNA workflow to enrich for fetal DNA

[28, 38], and similar mechanism may also explain our results for ctDNA. Further study is needed to deepen our understanding of cfDNA/ctDNA generation processes and/or to develop novel library construction methods for ctDNA enrichment.

4

Importantly, application of dsLib workflow further allows utilization of duplex UMIs, which make it possible to recover original dsDNA fragments following paired-end sequencing and utilize the information from complementary strands of DNA molecules to correct possible PCR and/or sequencing errors, achieving an extra low base error rate and higher specificity with variant detection [21]. Taken together, our results demonstrate that current state-of-the-art dsDNA-based library preparation is more preferable for the application of deep sequencing for ctDNA variant detection.

12

On the contrary, a clear advantage was observed for ssmLib libraries for bisulfite sequencing compared to dsmLib (Figure 2B-C). This is because libraries were constructed before bisulfite conversion during the dsmLib workflow (Figure 2A), and the nicked DNA resulting from the bisulfite conversion won't be sequenced due to the lack of paired adapters. During the ssmLib workflow, however, cfDNA ligation happens after the bisulfite treatment, where the nicked and single-stranded DNA molecules resulting from the bisulfite treatment can still be ligated with adapters, therefore preserving more DNA templates for sequencing (Figure 2A and 2D), eventually achieving a higher effective depth.

22

1 Theoretically, gentler enzyme-based cytosine conversion method would avoid the  
 2 assumed template loss caused by bisulfite treatment on the adapter-ligated library  
 3 fragments and may therefore greatly improve the results of dsLib workflow when  
 4 used for methylation profiling. Our results, however, still favored the bisulfite  
 5 conversion for both dsLib and ssmLib workflow due to the higher library yields as  
 6 well as higher deduplicated depths, suggesting that there may be excessive loss of  
 7 templates during the enzyme-conversion workflow (Figure 3C-E and Supplementary  
 8 Figure 4). Indeed, this may be attributed to the two rounds of beads purification in the  
 9 enzyme-based conversion. Also, the current enzyme-based conversion workflow is  
 10 more labor- and time-consuming compared to the bisulfite conversion. Development  
 11 of more effective enzyme-based cytosine conversion methods may require  
 12 improvements in template recovery and further simplification of the workflow.

13  
 14 In addition, methylation bias (M-bias) was proposed to be an important library  
 15 preparation quality metric for methylation profiling, since its existence could cause  
 16 significant bias in measurements of methylation level [41, 42]. M-bias is caused by  
 17 the end-repair step in the conventional dsLib workflow which typically recruits  
 18 unmethylated cytosines instead of methylated cytosines during the fill-in reaction  
 19 (Figure 2A). The filled-in cytosines were then converted to uracils regardless of the  
 20 original cytosine methylation status in the genome, resulting in incorrect methylation  
 21 level being assigned to the 3' end of the sequenced reads [41, 42]. The ssmLib method  
 22 could perfectly overcome this problem since it does not involve an end-repair step and

1 is a post-bisulfite conversion library construction method (Figure 2A and 2F), adding  
2 another advantage to the ssmLib method. Collectively, our results favor the use of  
3 ssmLib workflow for cfDNA methylation profiling. Our findings could help  
4 researchers maximize the efficiency of NGS library preparation and produce better  
5 quality sequencing data.

6

7

# Reference

1. Lui, Y.Y.N., et al., *Predominant Hematopoietic Origin of Cell-free DNA in Plasma and Serum after Sex-mismatched Bone Marrow Transplantation*. Clinical Chemistry, 2002. **48**(3): p. 421-427.
2. Snyder, Matthew W., et al., *Cell-free DNA Comprises an In Vivo Nucleosome Footprint that Informs Its Tissues-Of-Origin*. Cell, 2016. **164**(1): p. 57-68.
3. Aravanis, A.M., M. Lee, and R.D. Klausner, *Next-Generation Sequencing of Circulating Tumor DNA for Early Cancer Detection*. Cell, 2017. **168**(4): p. 571-574.
4. Lo, Y.M.D., et al., *Maternal Plasma DNA Sequencing Reveals the Genome-Wide Genetic and Mutational Profile of the Fetus*. Science Translational Medicine, 2010. **2**(61): p. 61ra91.
5. Chan, A.K., R.W. Chiu, and Y.M. Lo, *Cell-free nucleic acids in plasma, serum and urine: a new tool in molecular diagnosis*. Ann Clin Biochem, 2003. **40**(Pt 2): p. 122-30.
6. Schwarzenbach, H., D.S.B. Hoon, and K. Pantel, *Cell-free nucleic acids as biomarkers in cancer patients*. Nature Reviews Cancer, 2011. **11**(6): p. 426-437.
7. van der Pol, Y. and F. Mouliere, *Toward the Early Detection of Cancer by Decoding the Epigenetic and Environmental Fingerprints of Cell-Free DNA*. Cancer Cell, 2019. **36**(4): p. 350-368.
8. Bronkhorst, A.J., V. Ungerer, and S. Holdenrieder, *The emerging role of cell-free DNA as a molecular marker for cancer management*. Biomolecular detection and quantification, 2019. **17**: p. 100087-100087.
9. Volik, S., et al., *Cell-free DNA (cfDNA): Clinical Significance and Utility in Cancer Shaped By Emerging Technologies*. Molecular Cancer Research, 2016. **14**(10): p. 898.
10. Corcoran, R.B. and B.A. Chabner, *Application of Cell-free DNA Analysis to Cancer Treatment*. New England Journal of Medicine, 2018. **379**(18): p. 1754-1765.
11. Gormally, E., et al., *Circulating free DNA in plasma or serum as biomarker of carcinogenesis: Practical aspects and biological significance*. Mutation Research/Reviews in Mutation Research, 2007. **635**(2): p. 105-117.
12. Chabon, J.J., et al., *Integrating genomic features for non-invasive early lung cancer detection*. Nature, 2020.
13. Schuster, S.C., *Next-generation sequencing transforms today's biology*. Nature Methods, 2008. **5**(1): p. 16-18.
14. Shendure, J., et al., *DNA sequencing at 40: past, present and future*. Nature, 2017. **550**(7676): p. 345-353.
15. Tucker, T., M. Marra, and J.M. Friedman, *Massively parallel sequencing: the next big thing in genetic medicine*. American journal of human genetics, 2009. **85**(2): p. 142-154.
16. Green, E.D., E.M. Rubin, and M.V. Olson, *The future of DNA sequencing*. Nature, 2017. **550**(7675): p. 179-181.
17. Mardis, E.R., *DNA sequencing technologies: 2006–2016*. Nature Protocols, 2017. **12**(2): p. 213-218.
18. Lundberg, D.S., et al., *Practical innovations for high-throughput amplicon sequencing*. Nature Methods, 2013. **10**(10): p. 999-1002.
19. Gansauge, M.T., et al., *Single-stranded DNA library preparation from highly degraded DNA using T4 DNA ligase*. Nucleic Acids Res, 2017. **45**(10): p. e79.

- 1 20. Newman, A.M., et al., *An ultrasensitive method for quantitating circulating tumor DNA with*  
2 *broad patient coverage*. Nat Med, 2014. **20**(5): p. 548-54.
- 3 21. Newman, A.M., et al., *Integrated digital error suppression for improved detection of*  
4 *circulating tumor DNA*. Nat Biotechnol, 2016. **34**(5): p. 547-555.
- 5 22. Raine, A., et al., *SPLinted Ligation Adapter Tagging (SPLAT), a novel library preparation*  
6 *method for whole genome bisulphite sequencing*. Nucleic Acids Res, 2017. **45**(6): p. e36.
- 7 23. Olova, N., et al., *Comparison of whole-genome bisulfite sequencing library preparation*  
8 *strategies identifies sources of biases affecting DNA methylation data*. Genome Biol, 2018.  
9 **19**(1): p. 33.
- 10 24. Keats, J.J., et al., *Whole Genome Library Construction for Next Generation Sequencing, in*  
11 *Disease Gene Identification: Methods and Protocols*, J.K. DiStefano, Editor. 2018, Springer  
12 New York: New York, NY. p. 151-161.
- 13 25. Gansauge, M.T. and M. Meyer, *Single-stranded DNA library preparation for the sequencing of*  
14 *ancient or damaged DNA*. Nat Protoc, 2013. **8**(4): p. 737-48.
- 15 26. Glocke, I. and M. Meyer, *Extending the spectrum of DNA sequences retrieved from ancient*  
16 *bones and teeth*. Genome Res, 2017. **27**(7): p. 1230-1237.
- 17 27. Sanchez, C., et al., *Circulating nuclear DNA structural features, origins, and complete size*  
18 *profile revealed by fragmentomics*. JCI insight, 2021. **6**(7): p. e144561.
- 19 28. Vong, J.S., et al., *Single-stranded DNA library preparation preferentially enriches short*  
20 *maternal DNA in maternal plasma*. J Clinical chemistry, 2017. **63**(5): p. 1031-1037.
- 21 29. Chen, K., et al., *Non-invasive lung cancer diagnosis and prognosis based on multi-analyte*  
22 *liquid biopsy*. Molecular Cancer, 2021. **20**(1): p. 23.
- 23 30. Chen, S., et al., *fastp: an ultra-fast all-in-one FASTQ preprocessor*. Bioinformatics, 2018.  
24 **34**(17): p. i884-i890.
- 25 31. Li, H. and R. Durbin, *Fast and accurate short read alignment with Burrows–Wheeler*  
26 *transform*. Bioinformatics, 2009. **25**(14): p. 1754-1760.
- 27 32. Cheng, H. and Y. Xu, *BitMapperBS: a fast and accurate read aligner for whole-genome*  
28 *bisulfite sequencing*. bioRxiv, 2018: p. 442798.
- 29 33. Tarasov, A., et al., *Sambamba: fast processing of NGS alignment formats*. Bioinformatics,  
30 2015. **31**(12): p. 2032-2034.
- 31 34. Bronkhorst, A.J., J. Aucamp, and P.J. Pretorius, *Cell-free DNA: Preanalytical variables*. Clinica  
32 Chimica Acta, 2015. **450**: p. 243-253.
- 33 35. Underhill, H.R., et al., *Fragment length of circulating tumor DNA*. J PLoS genetics, 2016. **12**(7):  
34 p. e1006162.
- 35 36. Jiang, P., et al., *Lengthening and shortening of plasma DNA in hepatocellular carcinoma*  
36 *patients*. Proceedings of the National Academy of Sciences of the United States of America,  
37 2015. **112**(11): p. E1317-E1325.
- 38 37. Li, J., et al., *Cell-free DNA copy number variations in plasma from colorectal cancer patients*.  
39 Molecular oncology, 2017. **11**(8): p. 1099-1111.
- 40 38. Moser, T., et al., *Single-Stranded DNA Library Preparation Does Not Preferentially Enrich*  
41 *Circulating Tumor DNA*. Clinical Chemistry, 2017. **63**(10): p. 1656-1659.
- 42 39. Hayatsu, H., *Discovery of bisulfite-mediated cytosine conversion to uracil, the key reaction for*  
43 *DNA methylation analysis--a personal account*. Proceedings of the Japan Academy. Series B,  
44 Physical and biological sciences, 2008. **84**(8): p. 321-330.

- 1 40. Grunau, C., S.J. Clark, and A. Rosenthal, *Bisulfite genomic sequencing: systematic*  
2 *investigation of critical experimental parameters*. Nucleic Acids Res, 2001. **29**(13): p. E65-5.
- 3 41. Hansen, K.D., B. Langmead, and R.A. Irizarry, *BSmooth: from whole genome bisulfite*  
4 *sequencing reads to differentially methylated regions*. Genome Biology, 2012. **13**(10): p. R83.
- 5 42. Ryan, D.P. and D. Ehninger, *Bison: bisulfite alignment on nodes of a cluster*. BMC  
6 Bioinformatics, 2014. **15**(1): p. 337.
- 7 43. Vaisvila, R., et al., *EM-seq: Detection of DNA Methylation at Single Base Resolution from*  
8 *Picograms of DNA*. bioRxiv, 2019: p. 2019.12.20.884692.
- 9 44. Liu, Y., et al., *Bisulfite-free direct detection of 5-methylcytosine and 5-hydroxymethylcytosine*  
10 *at base resolution*. Nat Biotechnol, 2019. **37**(4): p. 424-429.
- 11 45. Kchouk, M., et al., *Generations of sequencing technologies: from first to next generation*.  
12 2017. **9**(3).

# Figure Legends

**Figure 1: Comparison of dsLib and ssLib workflow for cfDNA mutation detection by targeted deep sequencing.** (A) Schematic view of our self-developed dsLib and ssLib workflow. See Methods for more details. (B) Deduplicated depths of libraries constructed by dsLib, ssLib, and the KAPA kit. Duplicates were performed for each experimental condition. Data are presented as mean  $\pm$  SD. N.S,  $p \geq 0.05$ ; \*,  $0.01 \leq p < 0.05$ ; \*\*,  $0.001 \leq p < 0.01$ ; \*\*\*\*,  $p < 0.0001$ , as calculated by Student's t-test. (C) Detection of low VAF mutations by dsLib workflow in simulated cfDNA samples. Triplicates were performed for each experimental condition. Data are presented as mean  $\pm$  SD. The numbers in parentheses represent the number of detected mutations/total mutations. (D) CNVs detected by dsLib and ssLib methods respectively, in plasma cfDNA samples from lung cancer patients P1 and P2. X-axis, chromosome. Y-axis, CNV adjusted by GC content and map-ability.

**Figure 2: Comparison of dsmLib and ssmLib workflow for cfDNA methylation profiling by bisulfite sequencing.** (A) Schematic view of our dsmLib and ssmLib procedures. (B) On-target rates and (C) deduplicated depths of libraries prepared by dsmLib and ssmLib workflow. Duplicates were performed for each experimental condition. Data are presented as mean  $\pm$  SD. N.S,  $p \geq 0.05$ ; \*,  $0.01 \leq p < 0.05$ ; \*\*,  $0.001 \leq p < 0.01$ ; \*\*\*\*,  $p < 0.0001$ , as calculated by Student's t-test. (D) Size distributions of library insert fragments. (E) Pearson correlation of methylation levels between ssmLib (x-axis) and dsmLib (y-axis) libraries. (F) M-bias plots of libraries prepared by dsmLib and ssmLib workflow. For each row from left to right: Read 1 ++ strand, Read 1 +-strand, Read 2 +- strand, and Read 2 --strand. X-axis, position in read (bp). Y-axis, methylation level (%).

**Figure 3: Comparison of the chemical and enzymatic cytosine conversion for cfDNA methylation sequencing.** (A) Technical principles of bisulfite conversion and enzymatic conversion. 5caC, 5-carboxylcytosine. T, thymine. (B) Size distribution of library insert fragments. X-axis, fragment size (bp). Y-axis, frequency count. (C) CT conversion rates, (D) library yields, and (E) deduplicated depths of ssmLib libraries. Duplicates were performed for each experimental condition. Data are presented as mean  $\pm$  SD. N.S,  $p \geq 0.05$ ; \*,  $0.01 \leq p < 0.05$ , as calculated by Student's t-test.



1 **Supplementary Figure 1: (A) Library yields and (B) mean fragment lengths of**  
 2 **sequenced libraries constructed by dsLib, ssLib, and the KAPA workflow.**  
 3 Duplicates were performed for each experimental condition. Data are presented as  
 4 mean  $\pm$  SD. N.S,  $p \geq 0.05$ ; \*,  $0.01 \leq p < 0.05$ ; \*\*,  $0.001 \leq p < 0.01$ ; \*\*\*\*,  $p < 0.0001$ , as  
 5 calculated by Student's t-test.

6 **Supplementary Figure 2: Library yields by dsmLib and ssmLib.** Duplicates were  
 7 performed for each experimental condition. Data are presented as mean  $\pm$  SD. N.S,  
 8  $p \geq 0.05$ ; \*,  $0.01 \leq p < 0.05$ ; \*\*,  $0.001 \leq p < 0.01$ , as calculated by Student's t-test.

9 **Supplementary Figure 3: Pearson correlation of methylation levels between (A)**  
 10 **dsmLib or (B) ssmLib libraries.**

11 **Supplementary Figure 4: (A) CT conversion rates, (B) library yields, and (C)**  
 12 **deduplicated depths of dsmLib libraries using bisulfite and enzymatic conversion.**  
 13 Duplicates were performed for each experimental condition. Data are presented as  
 14 mean  $\pm$  SD. N.S,  $p \geq 0.05$ ; \*,  $0.01 \leq p < 0.05$ , as calculated by Student's t-test.

15

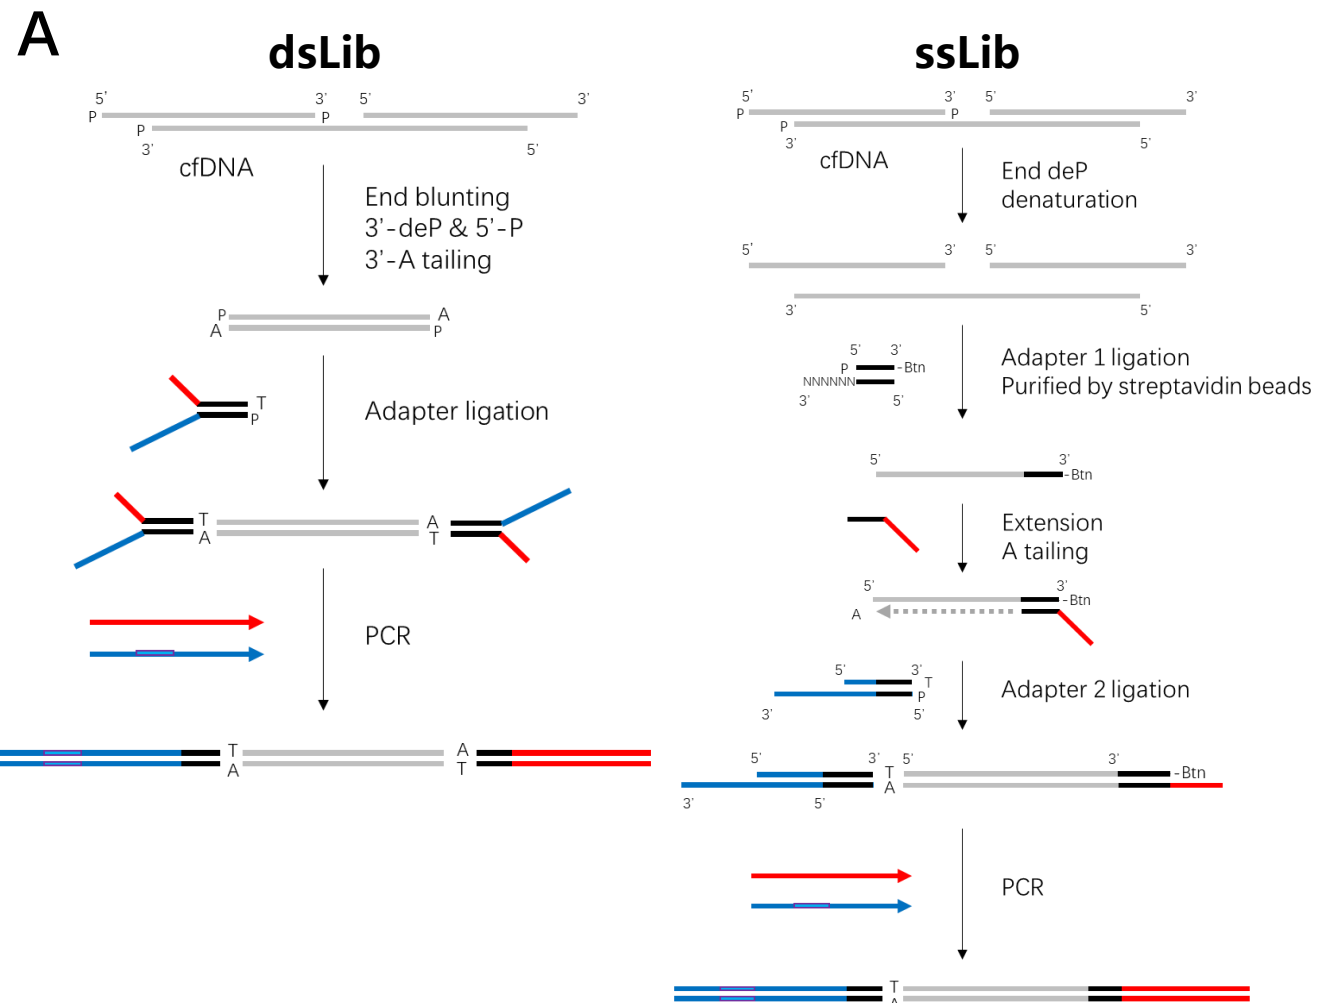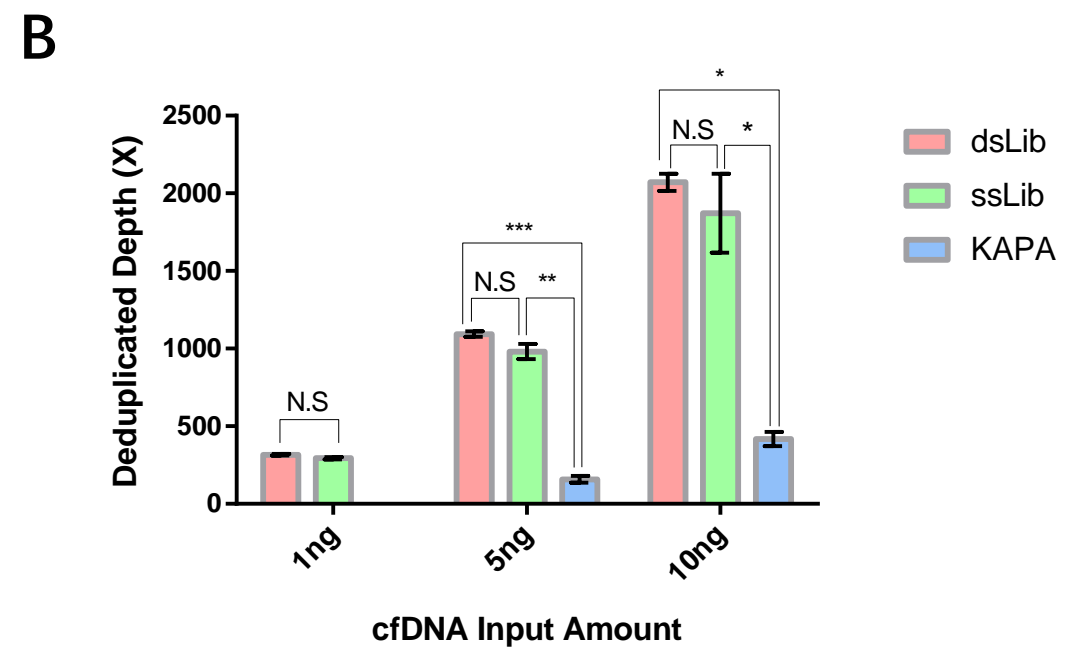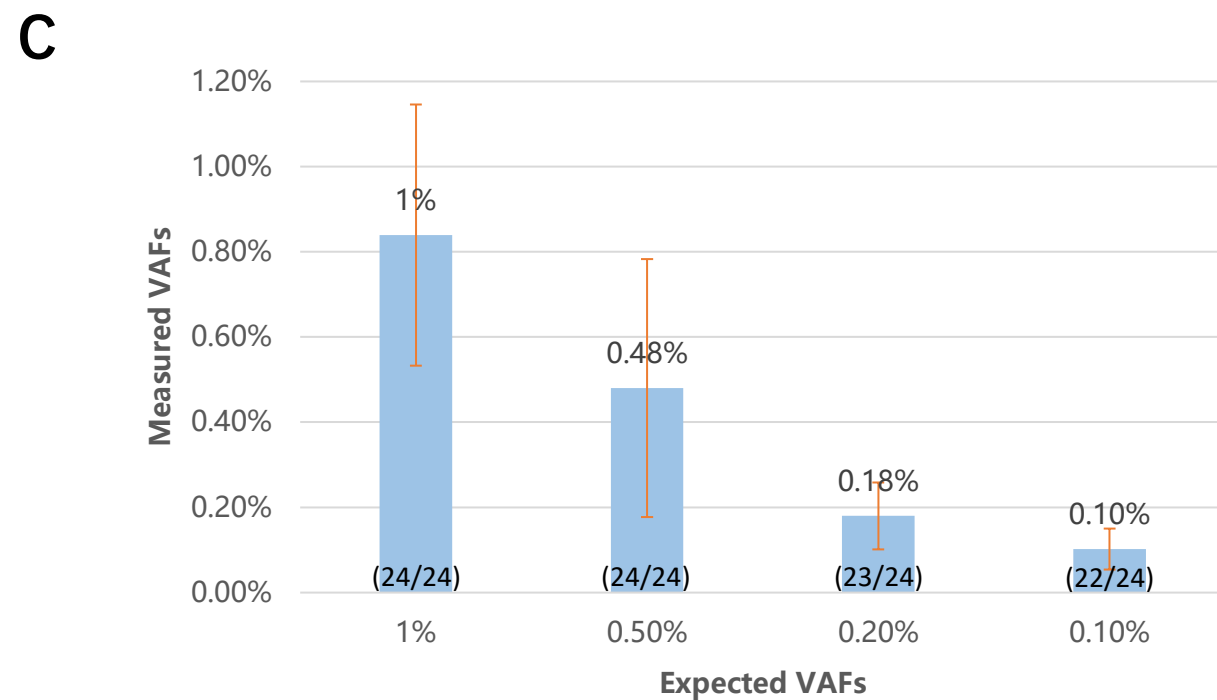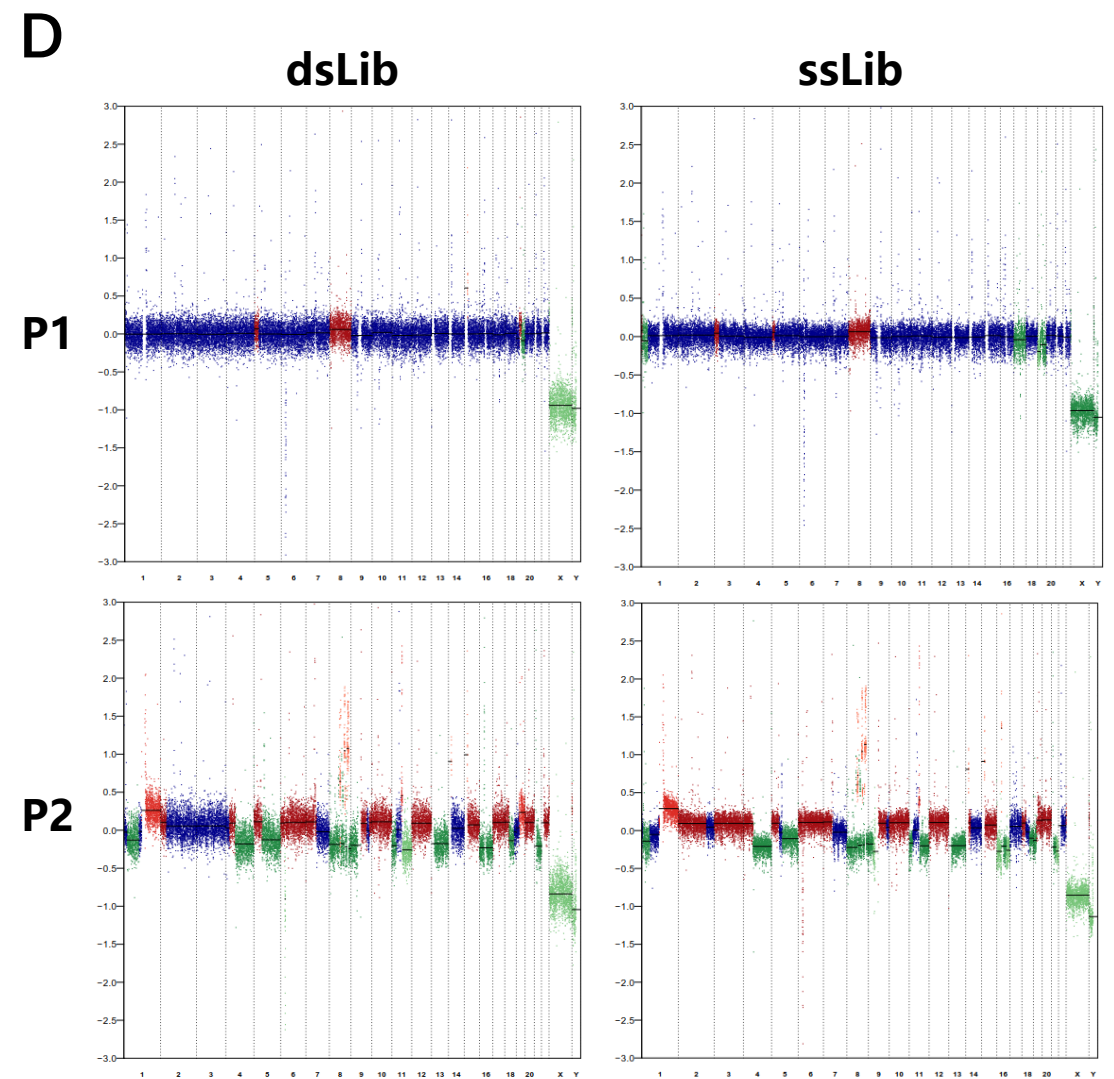

A

## dsmLib

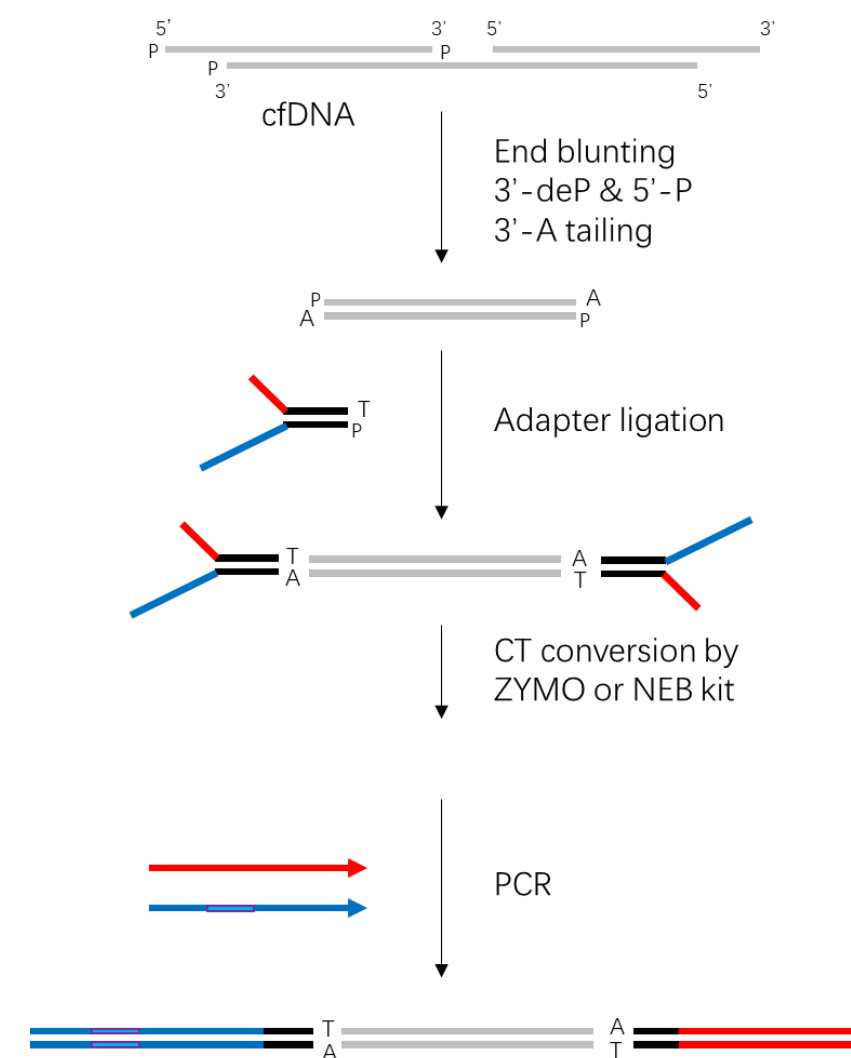

## ssmLib

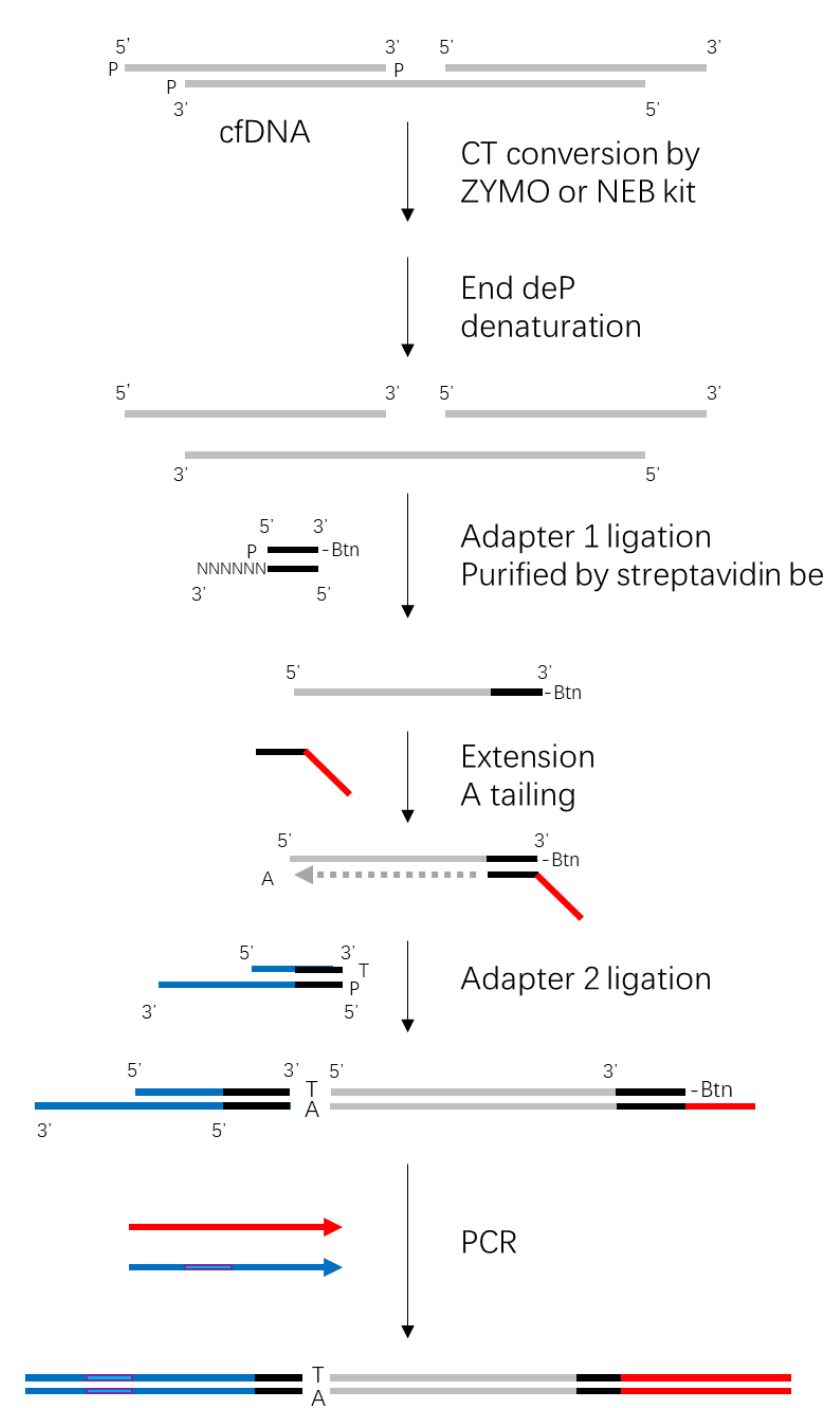

D

Frequency

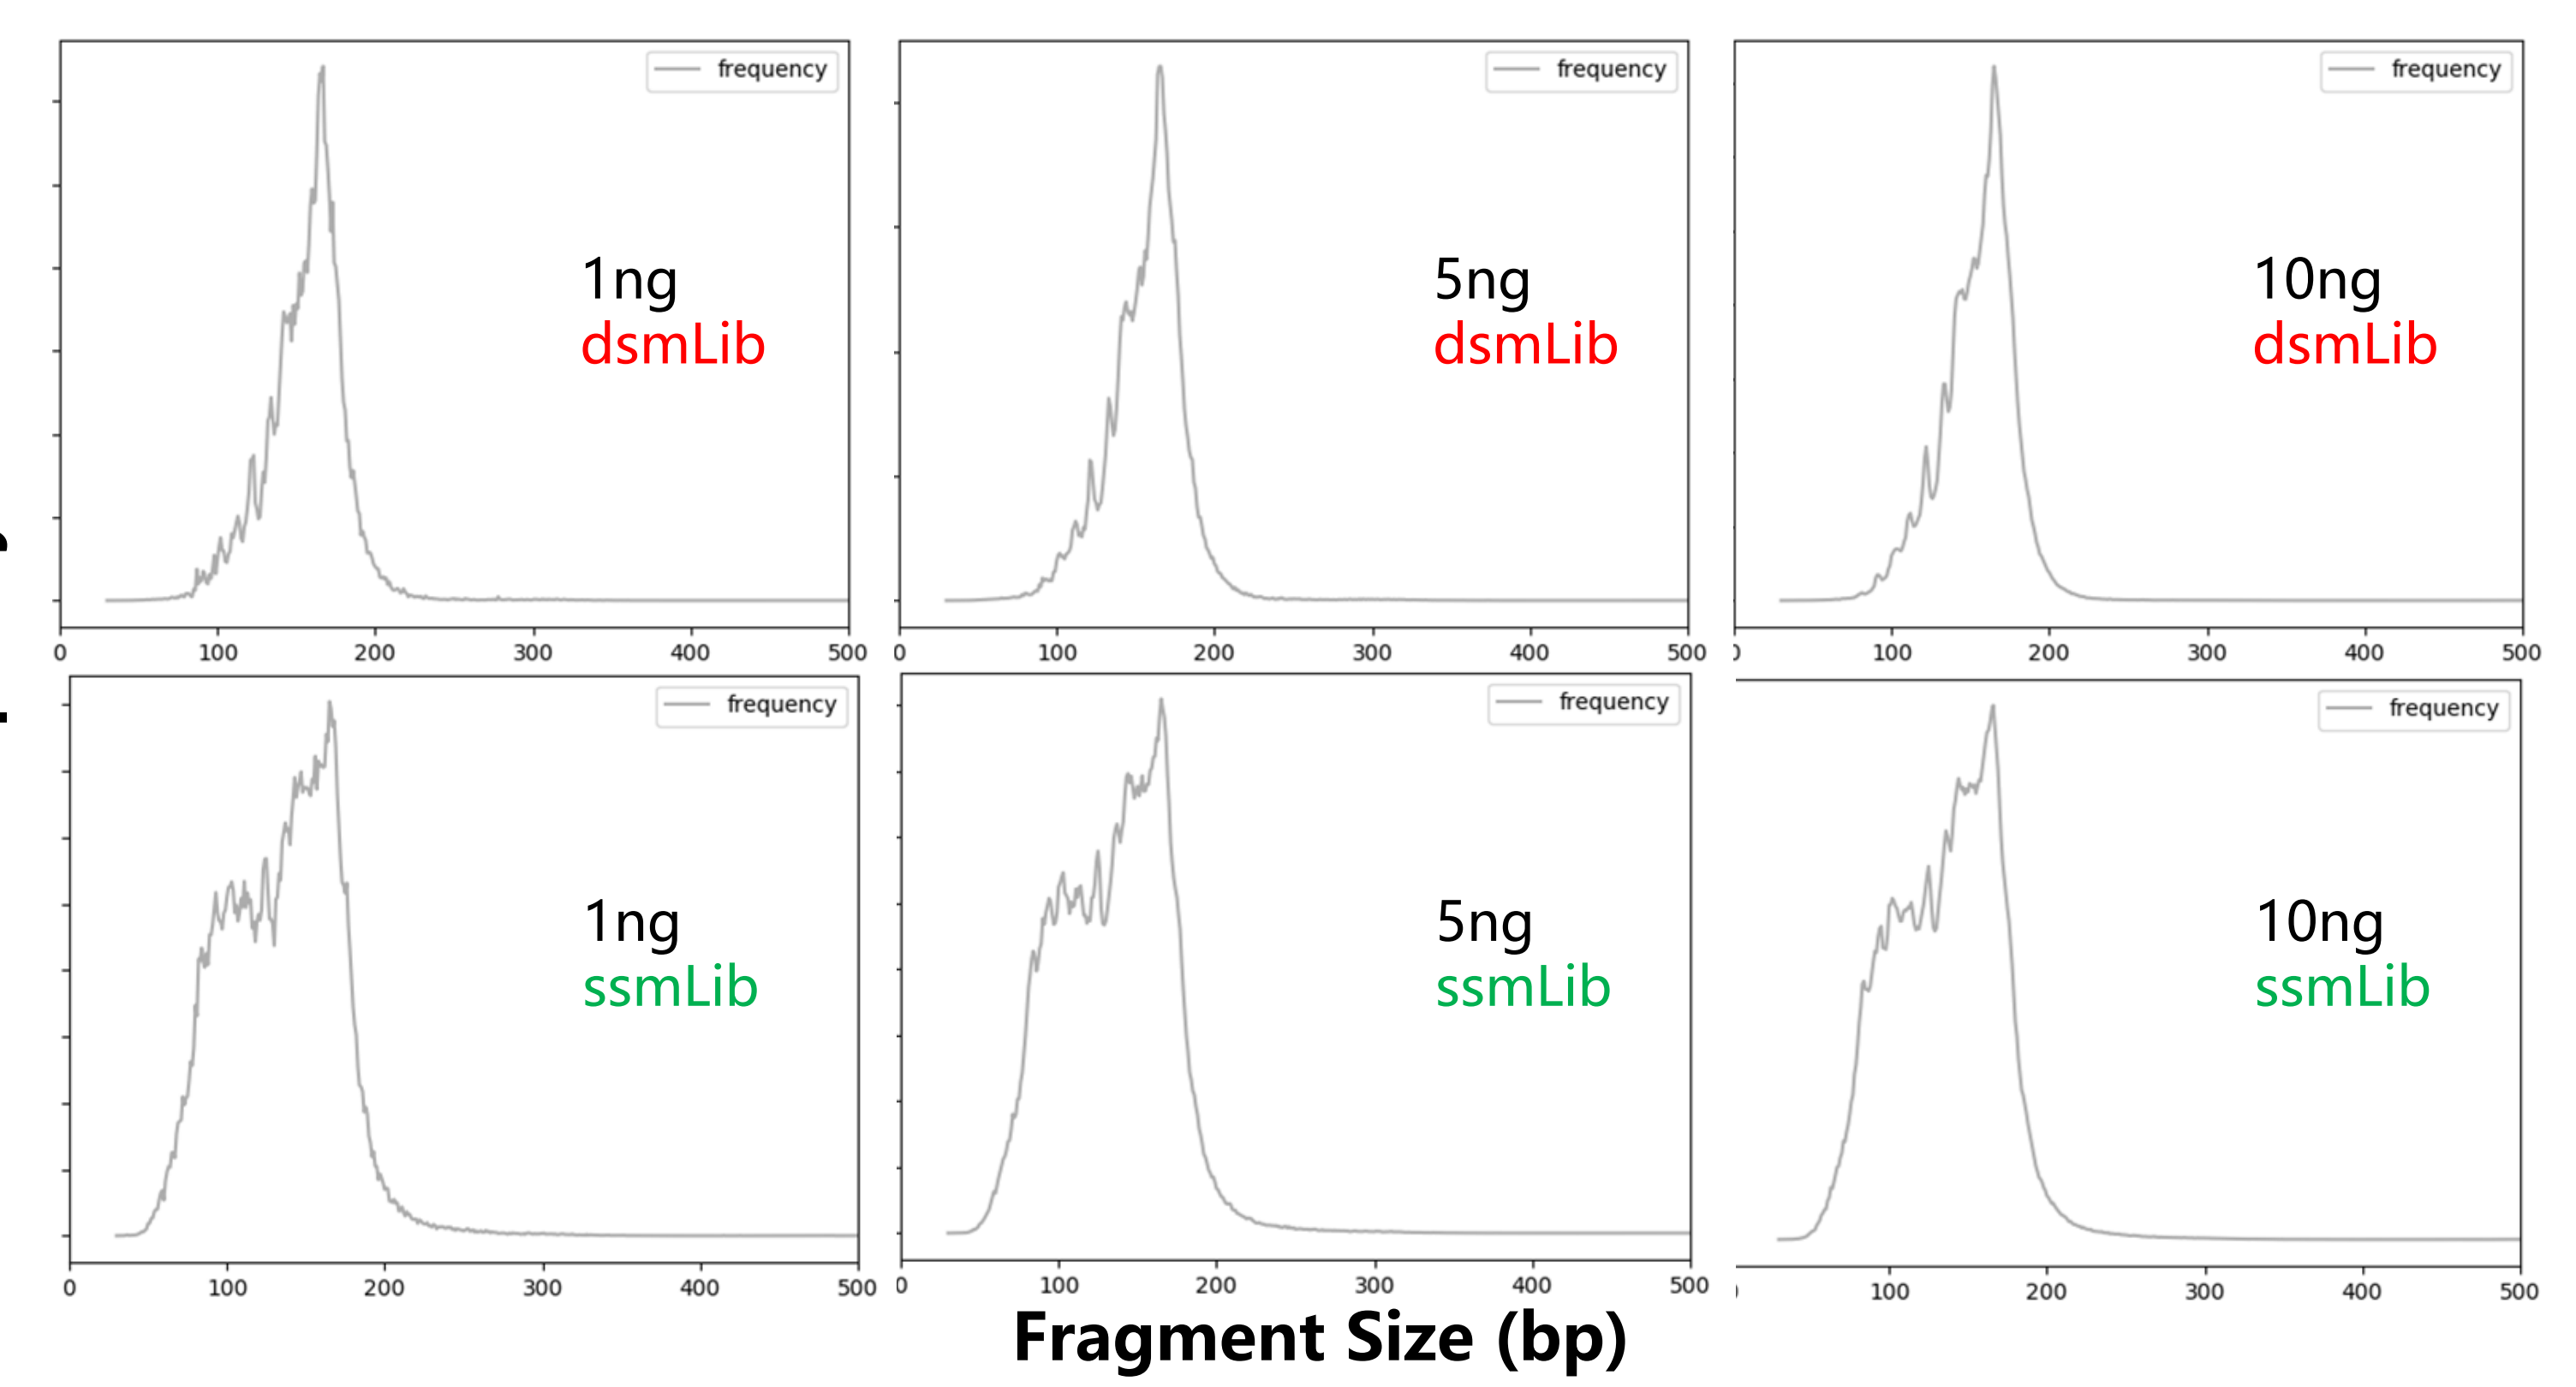

B

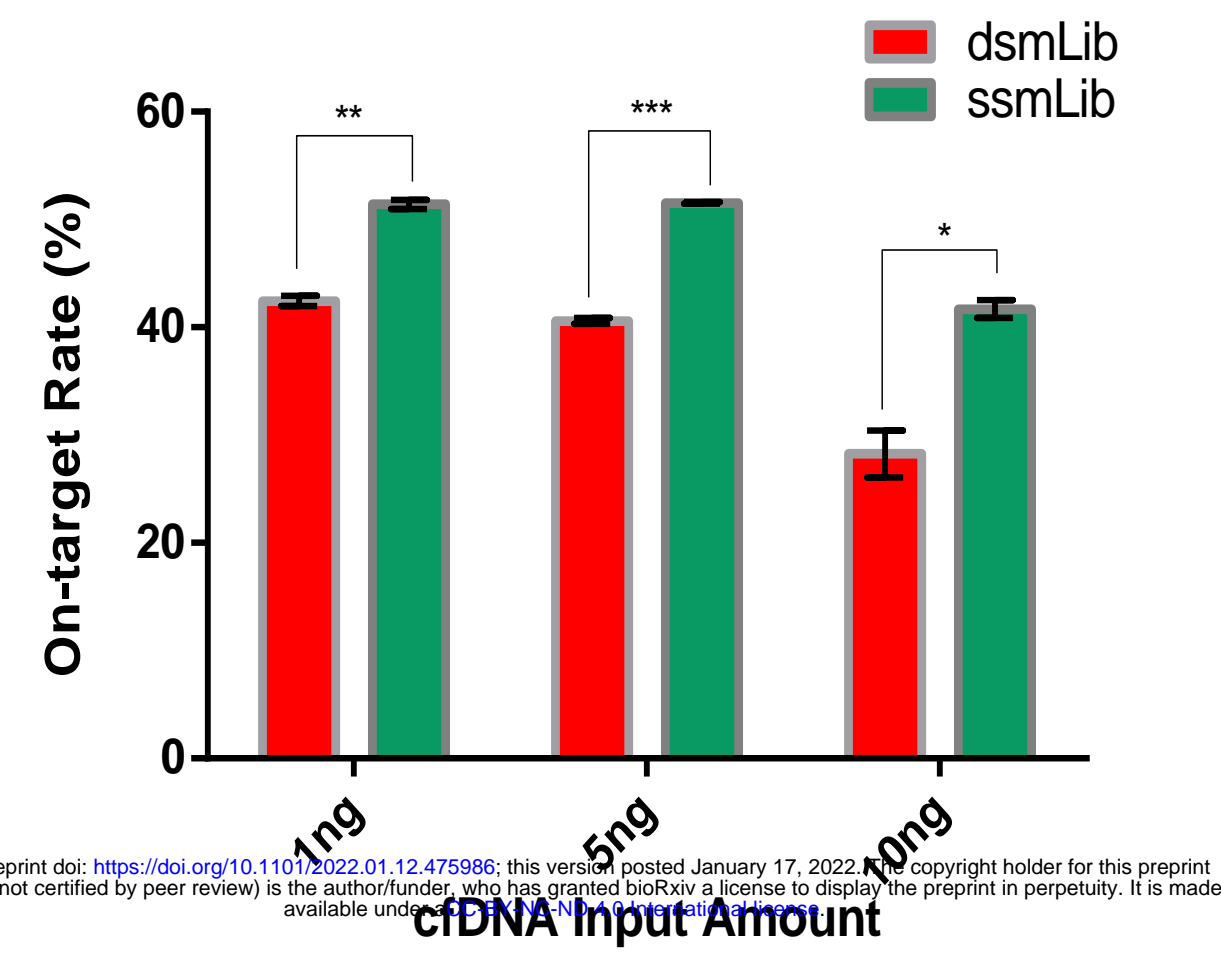

C

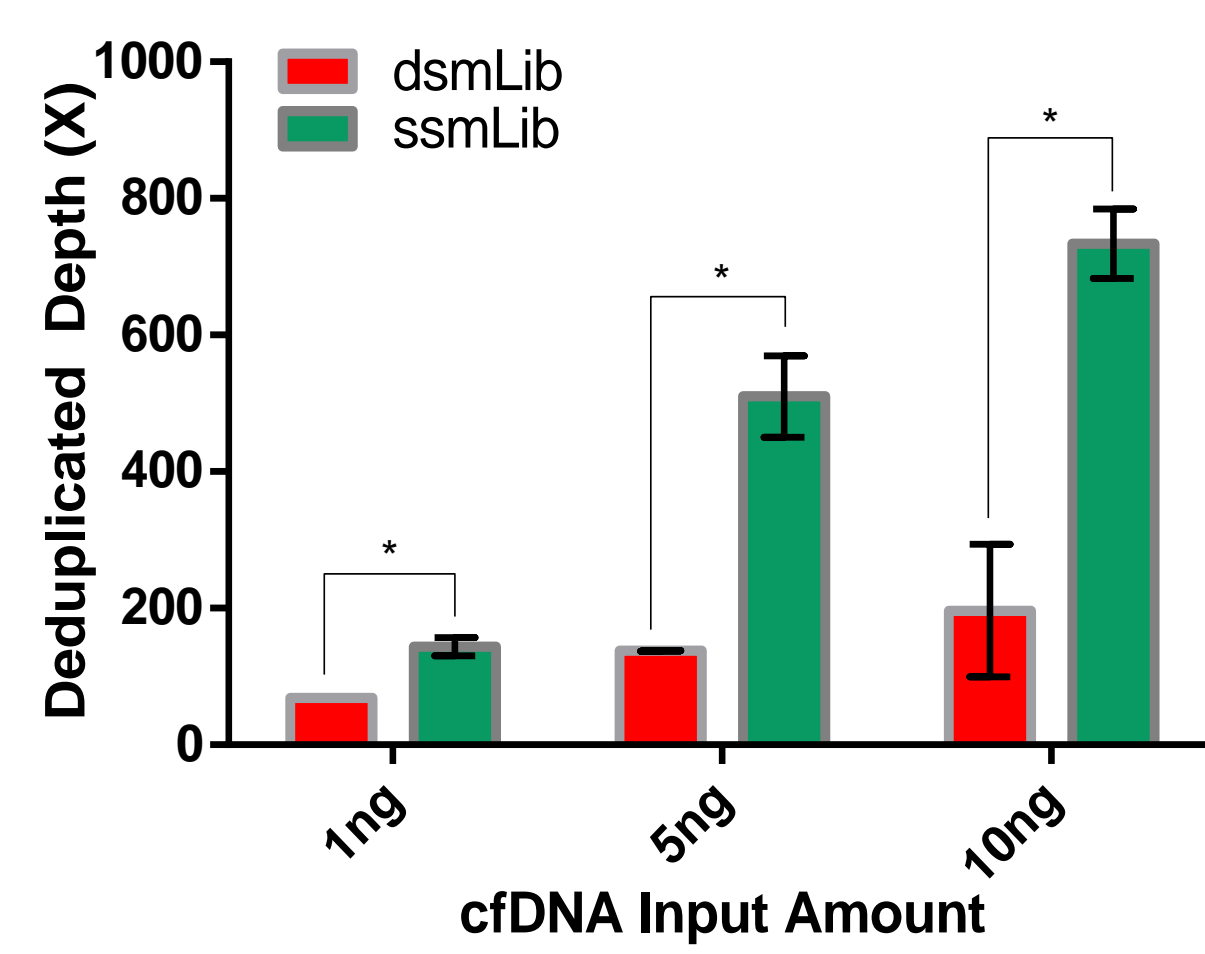

E

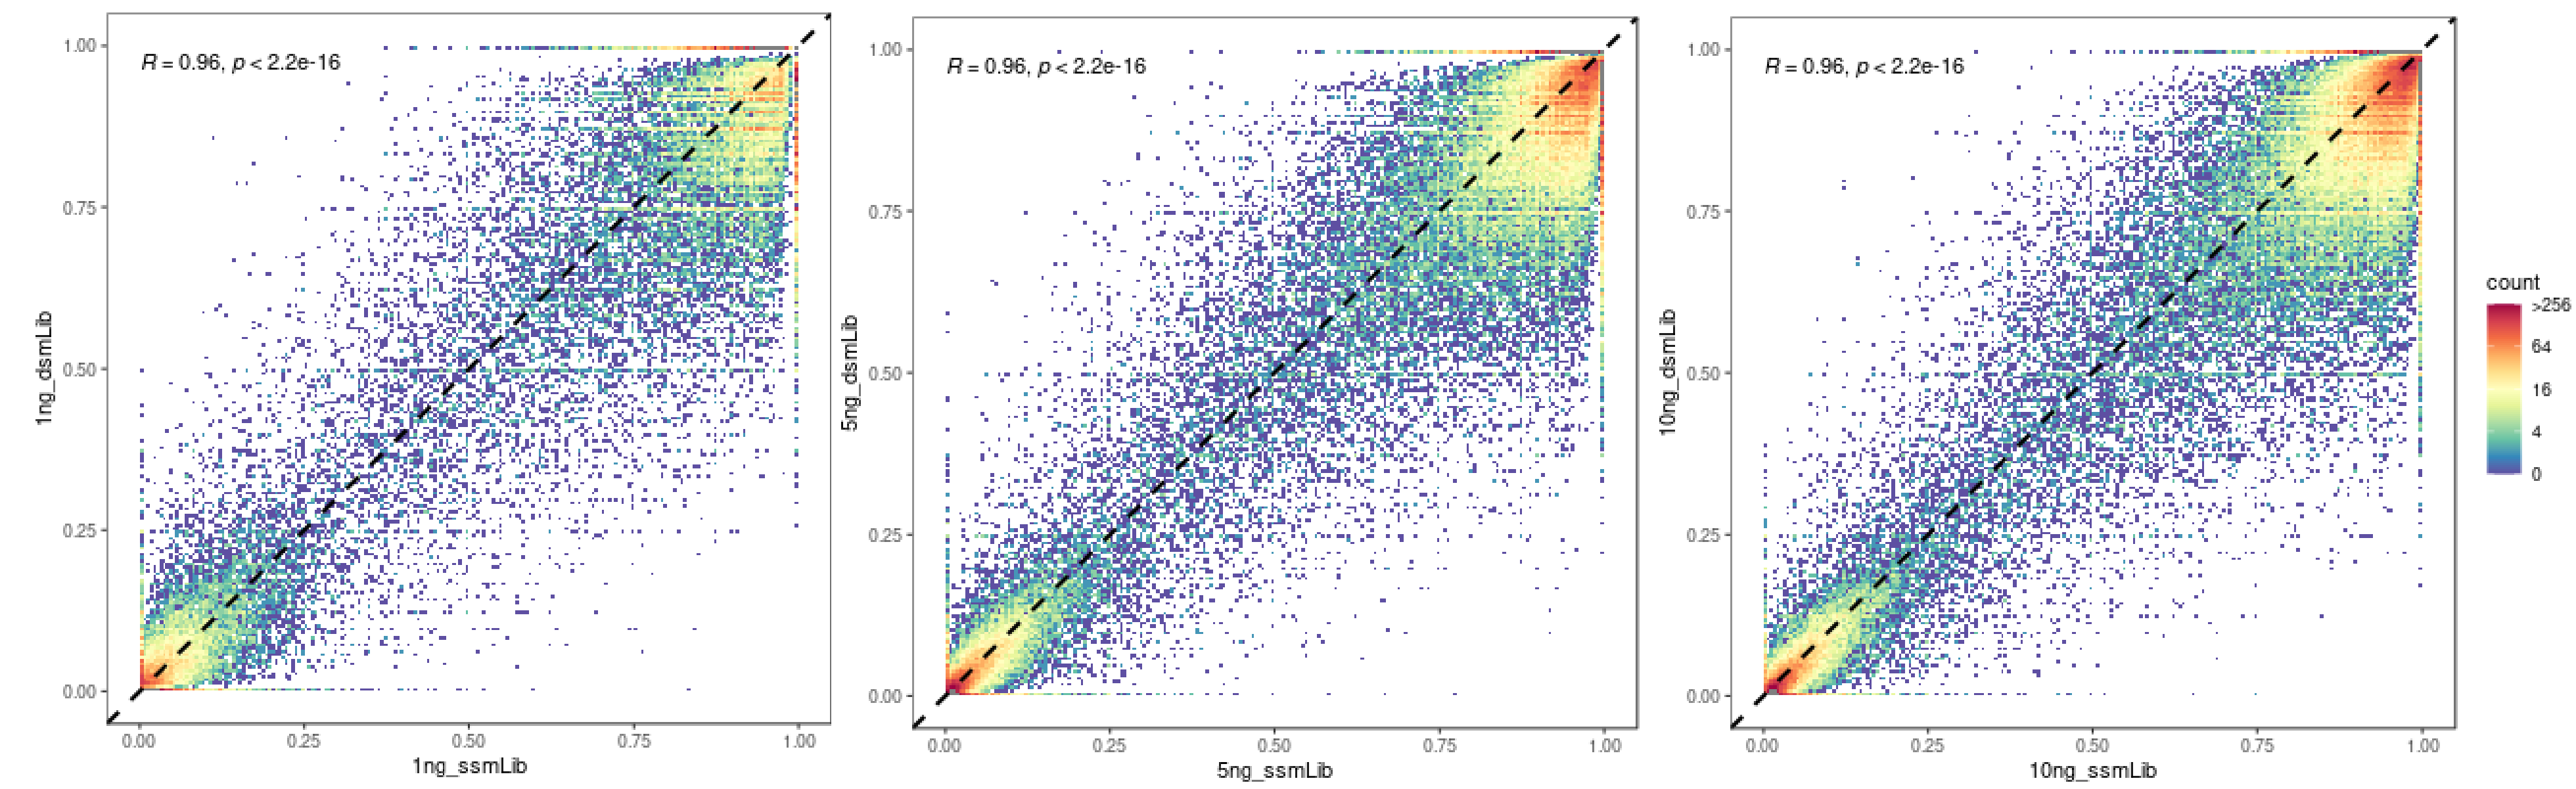

F

Read 1

-- strand

Read 2

-- strand

dsmLib

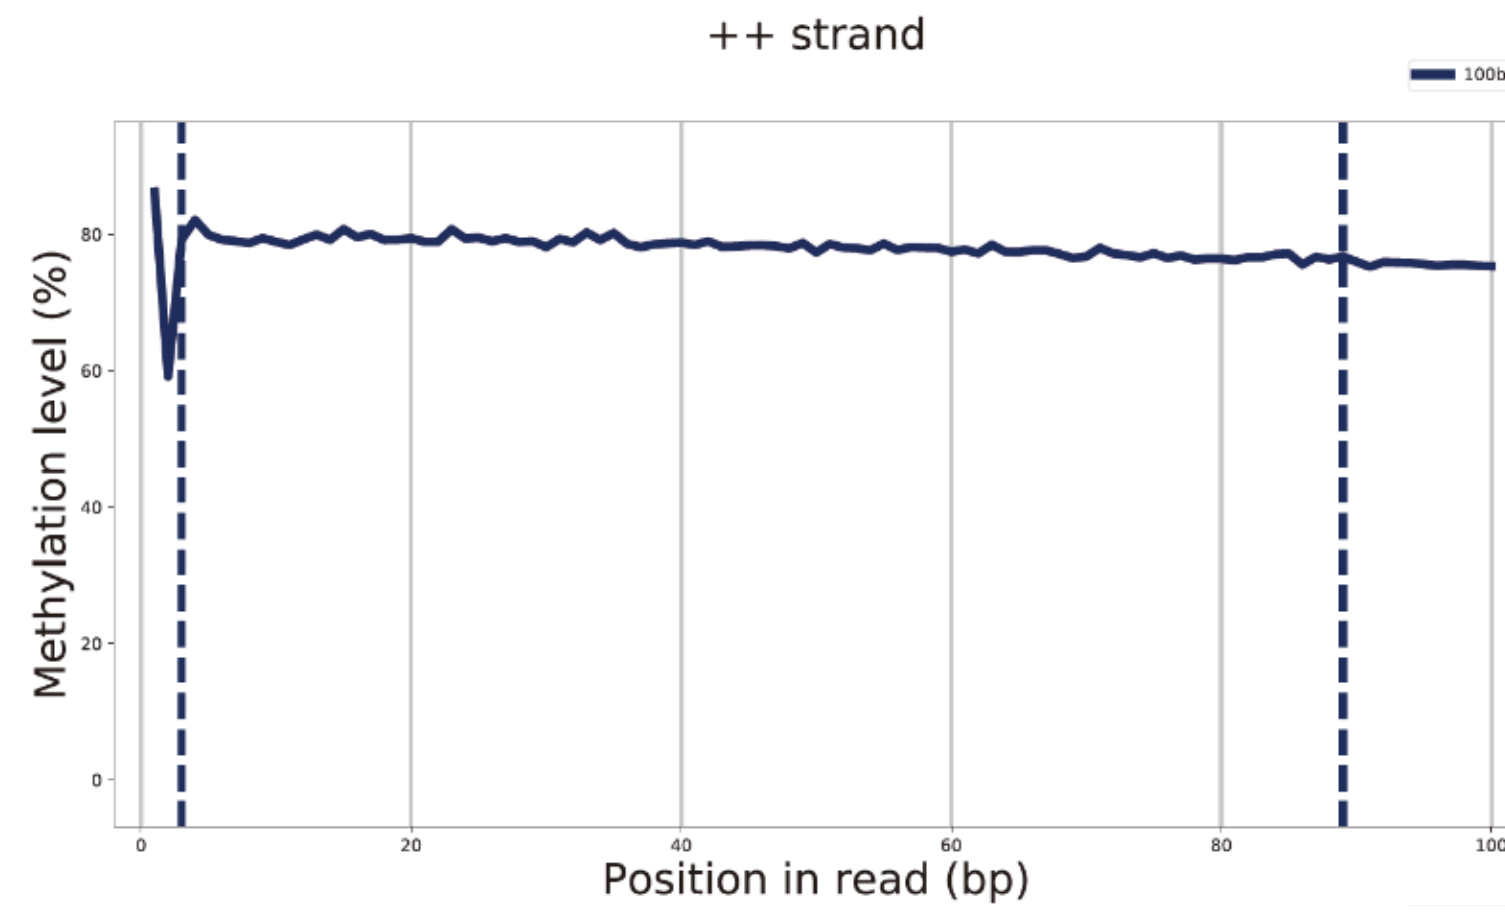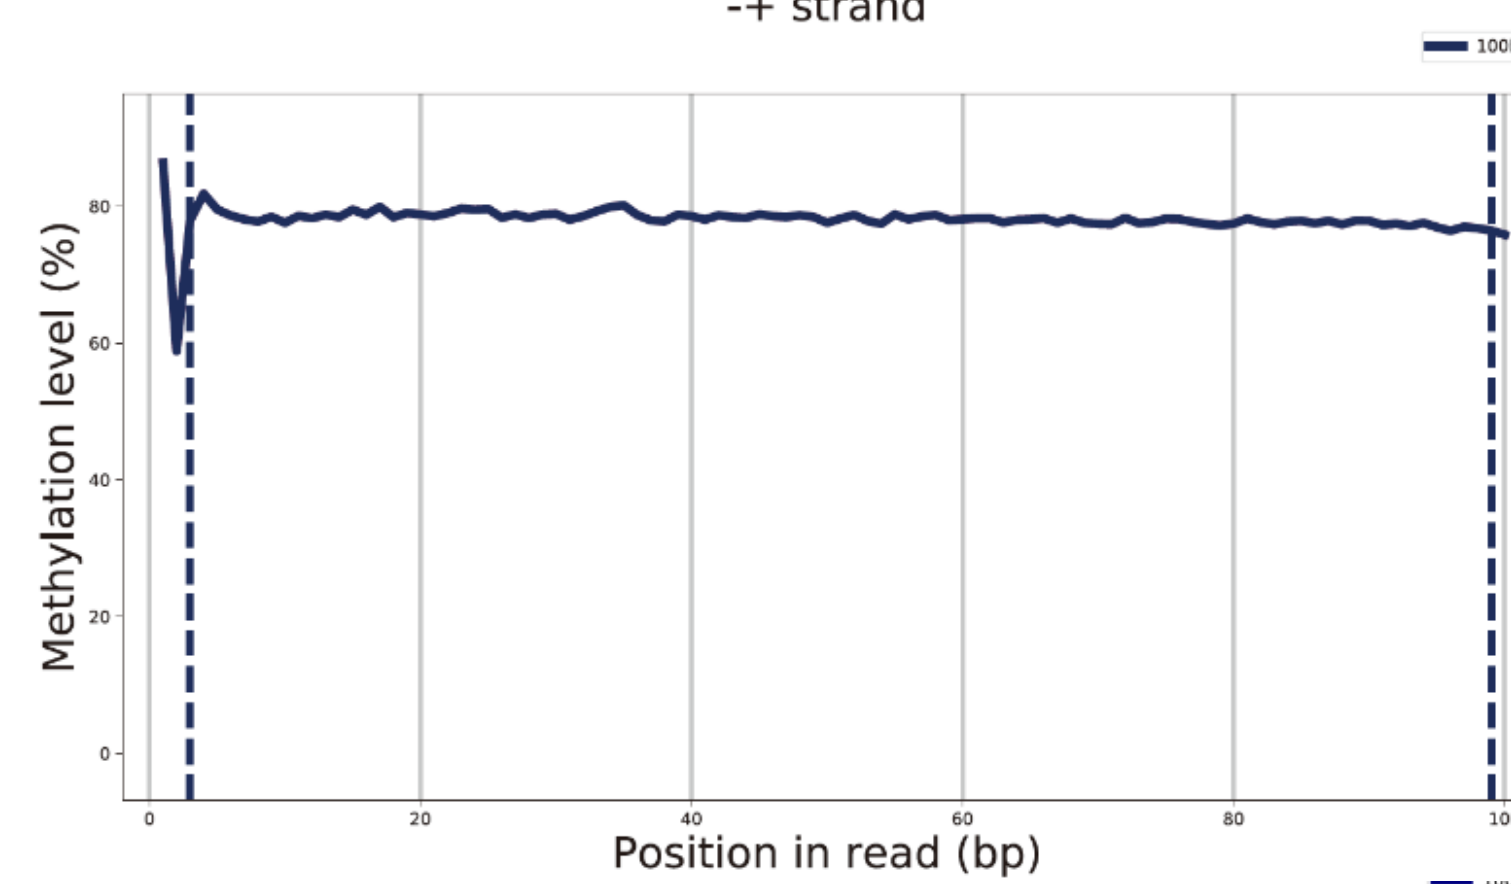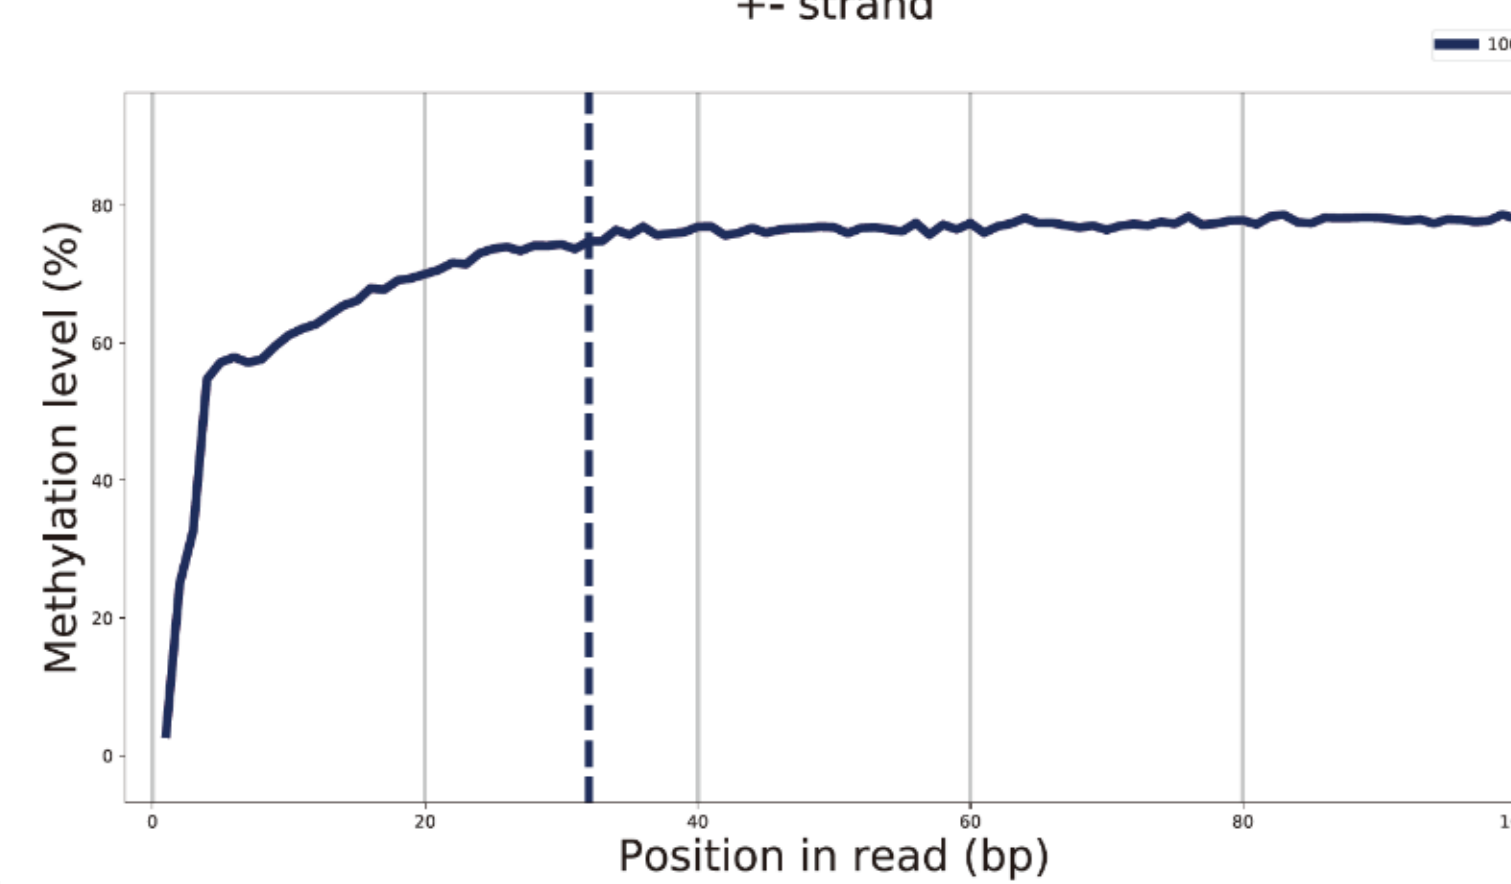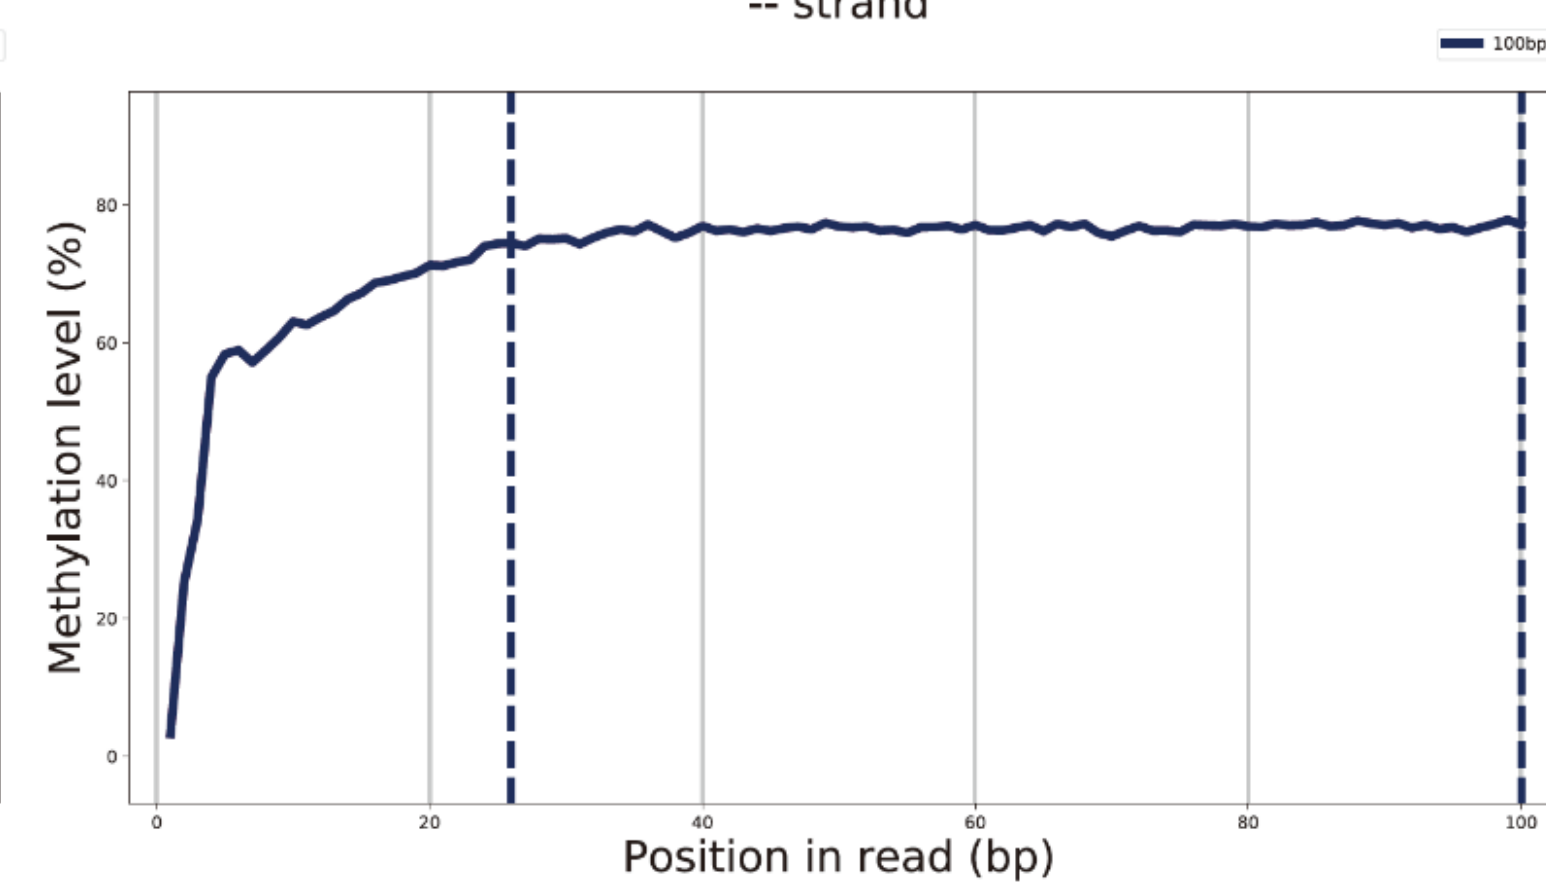

ssmLib

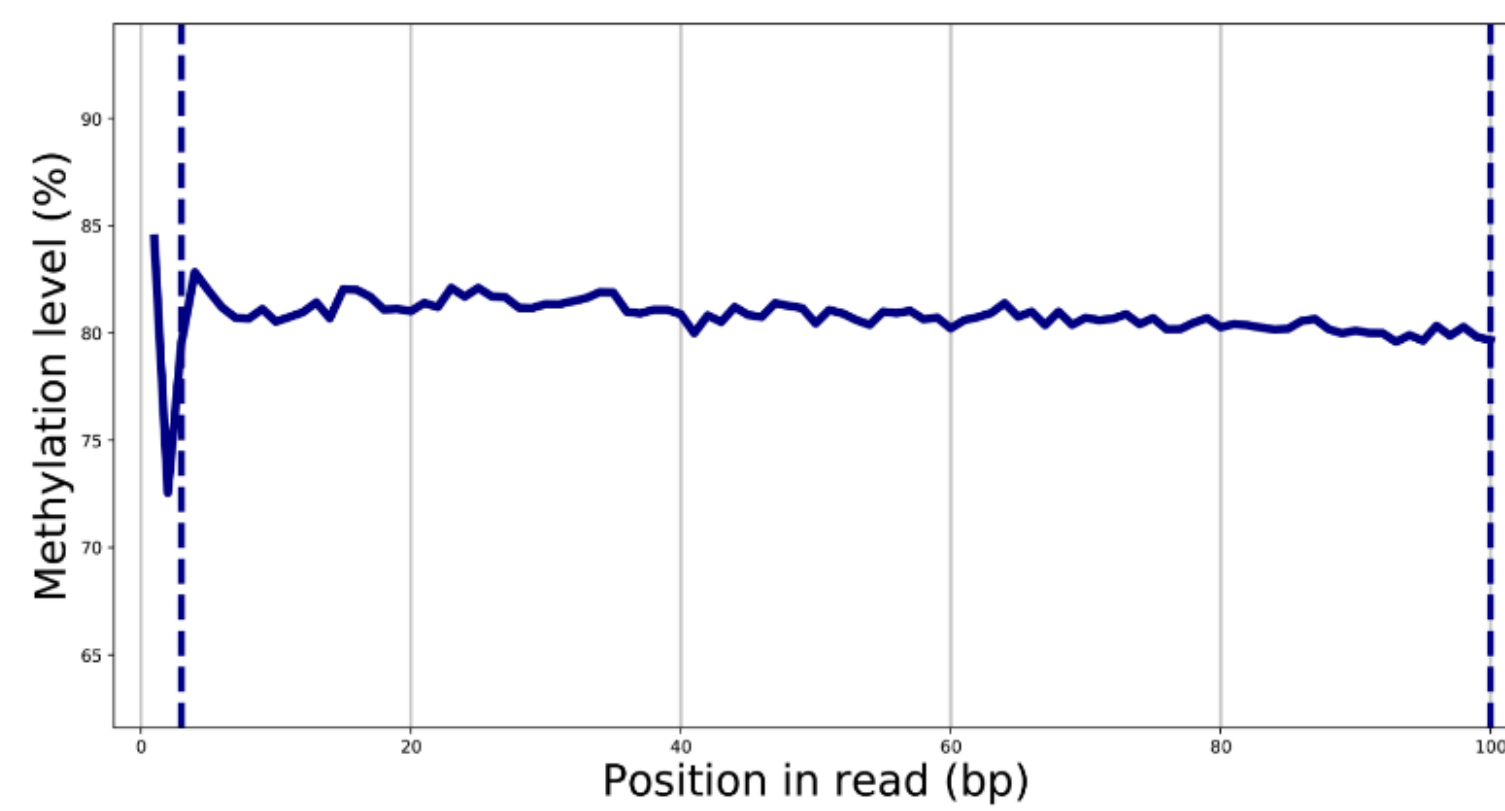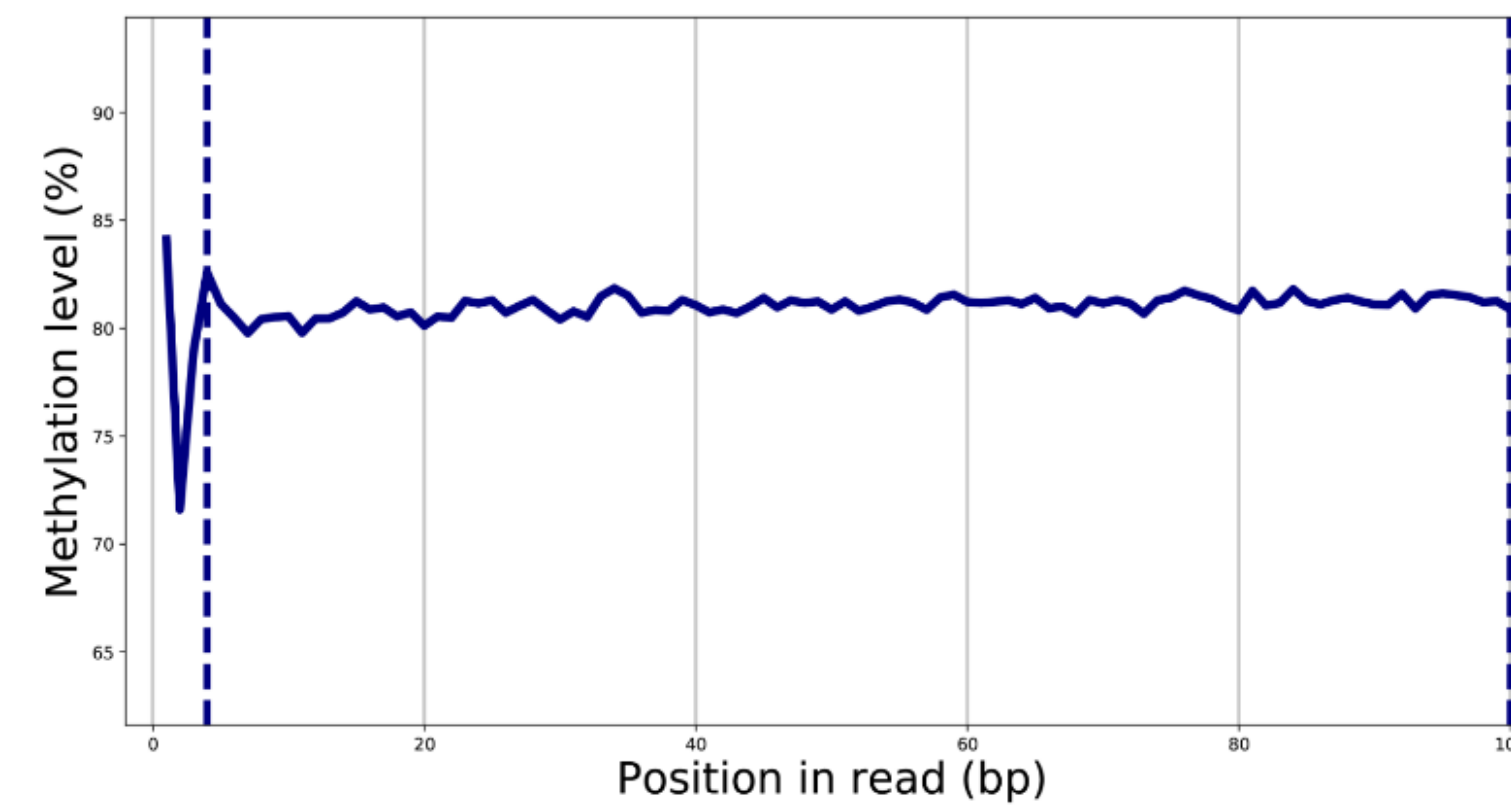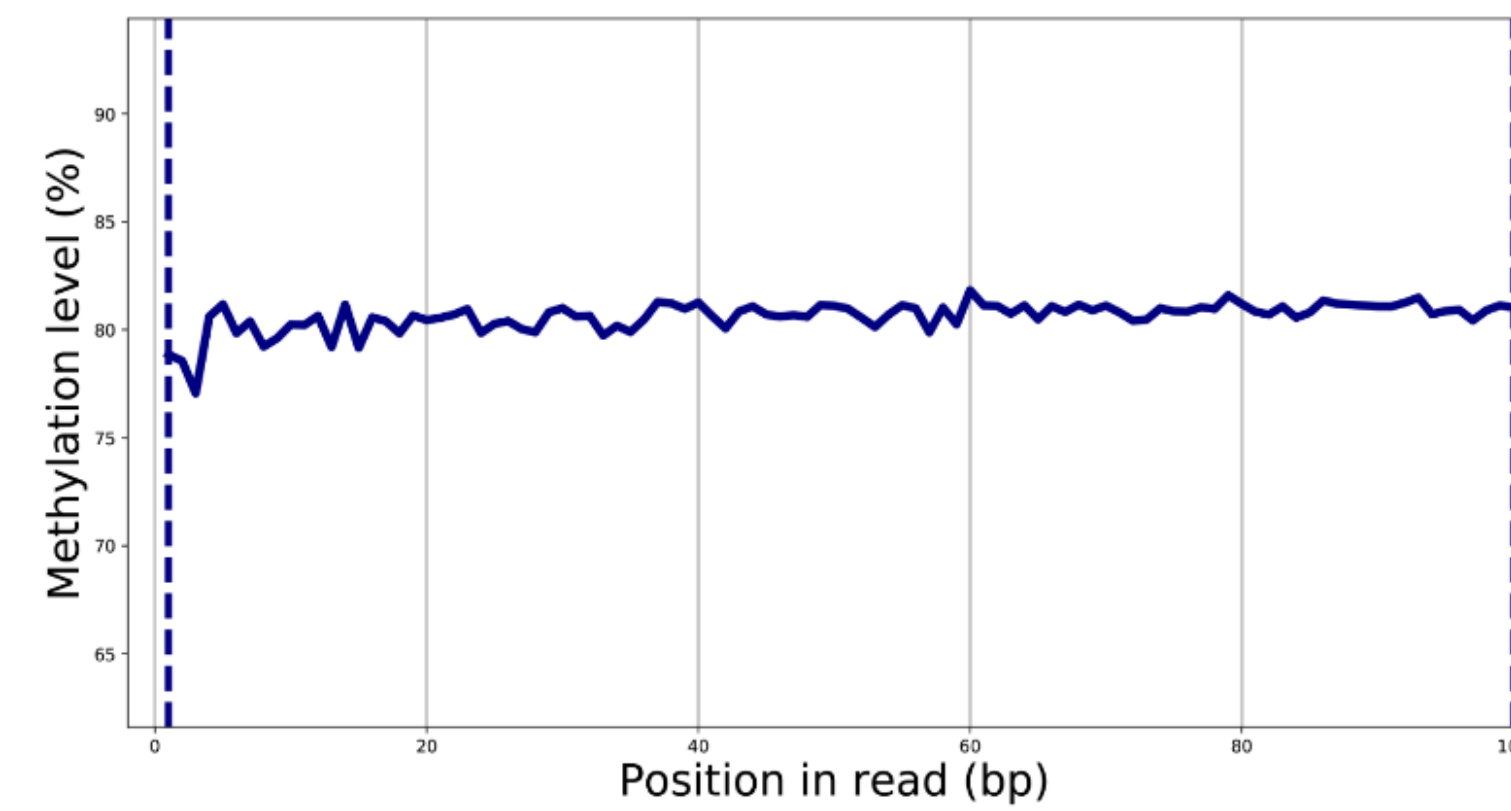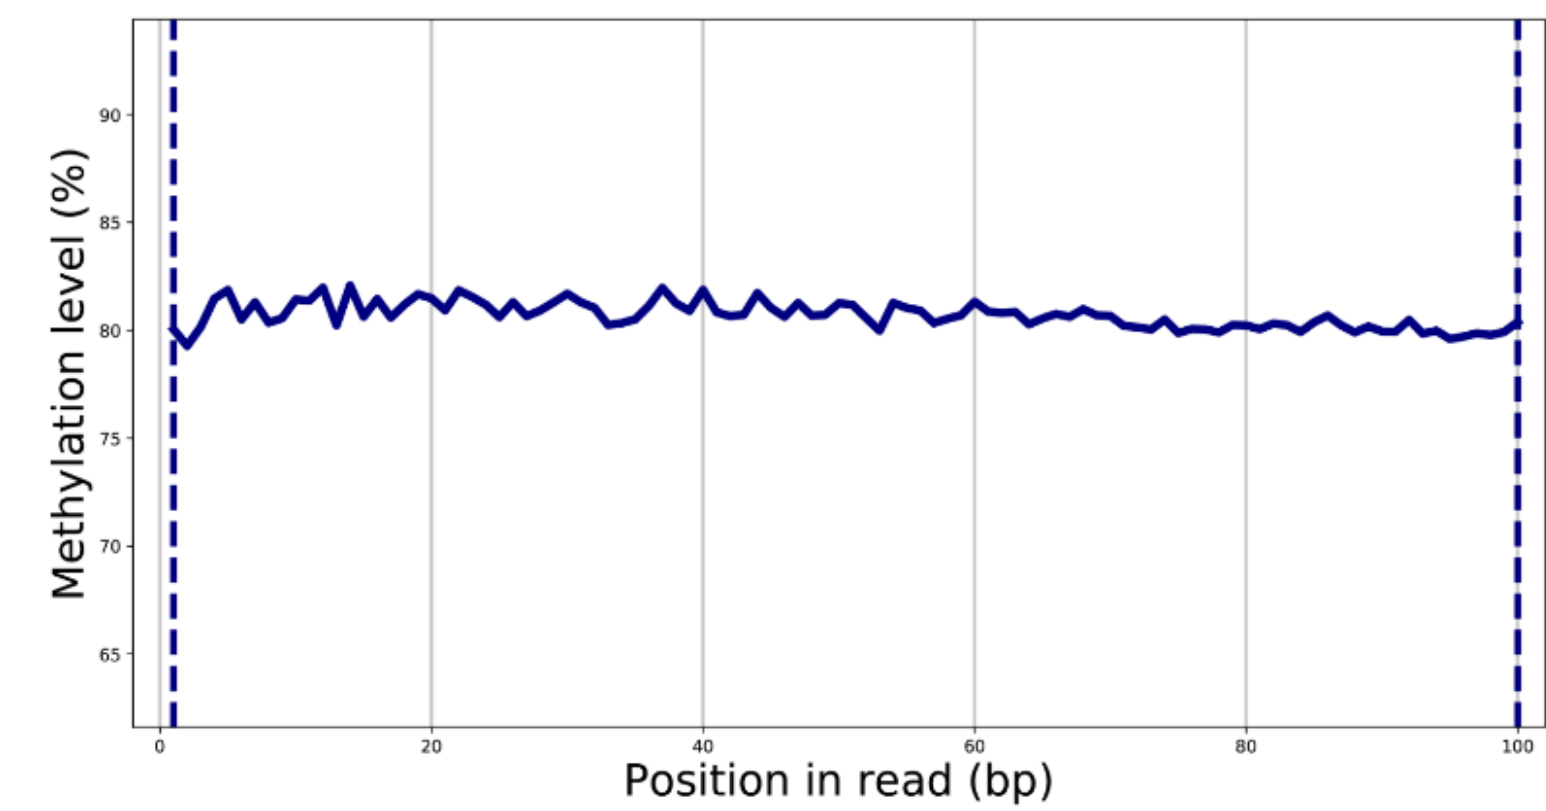

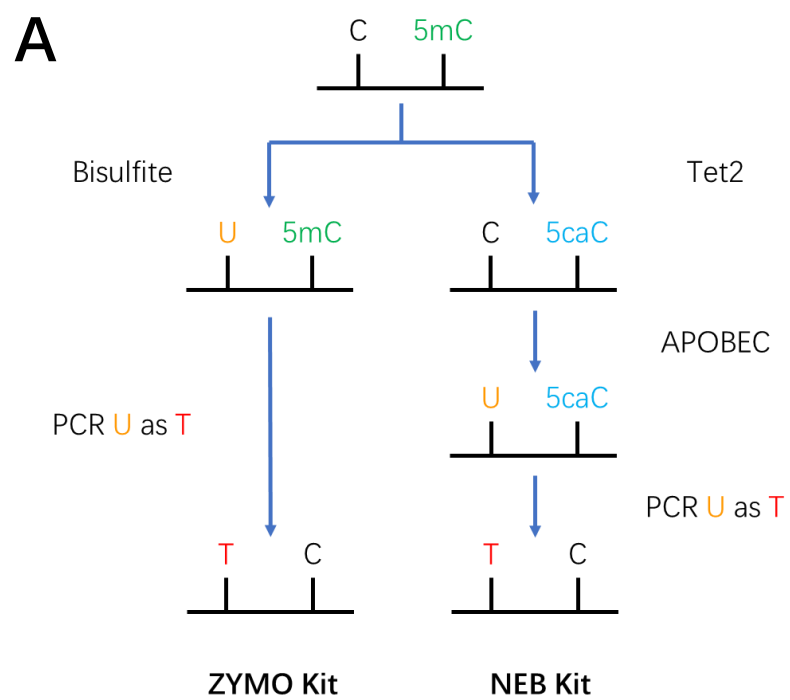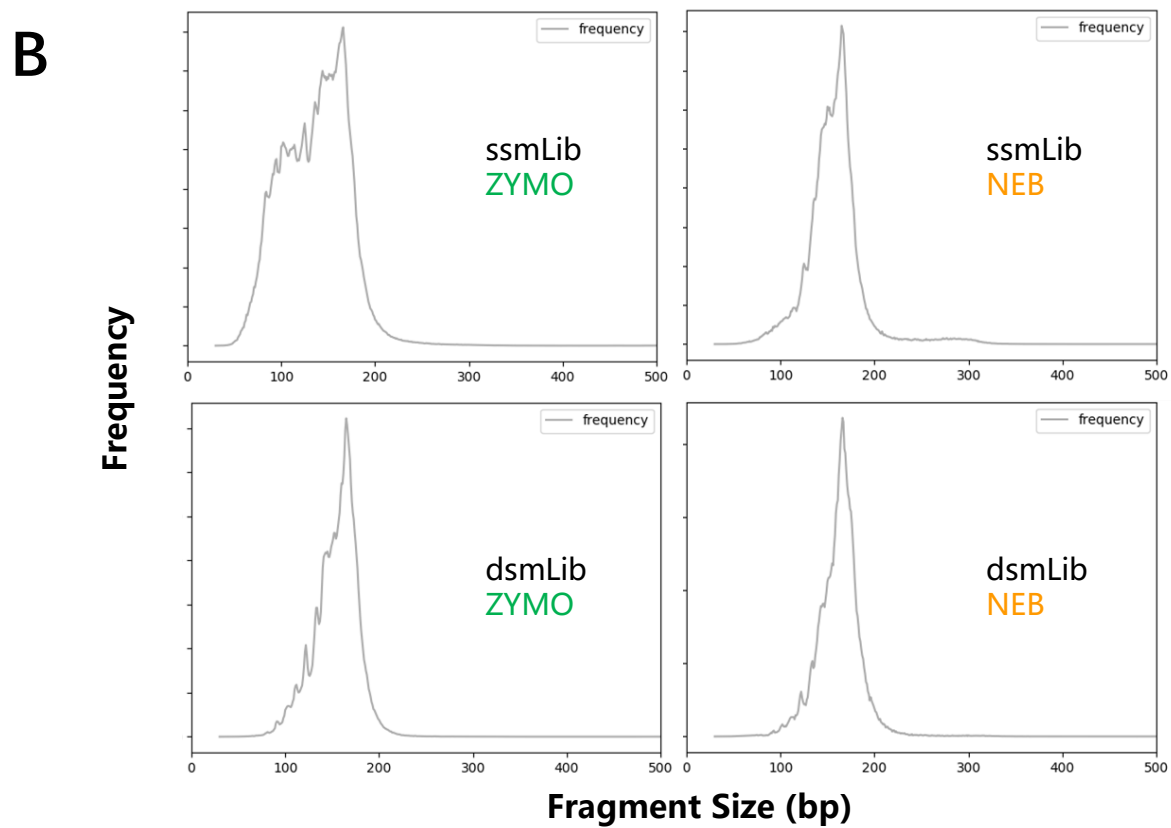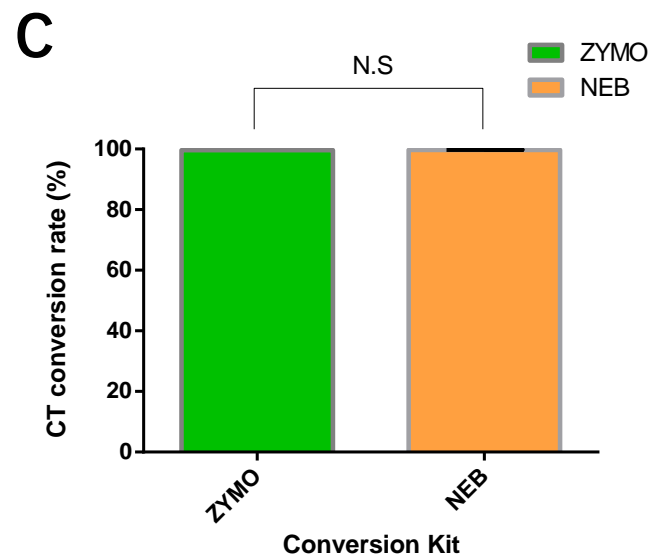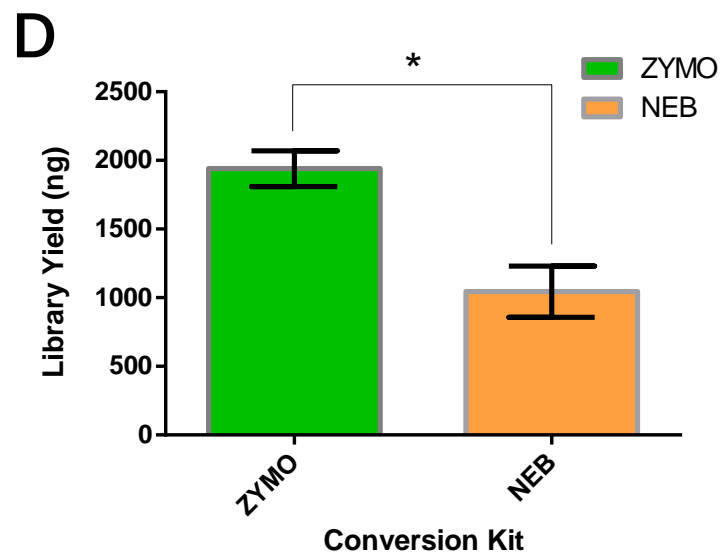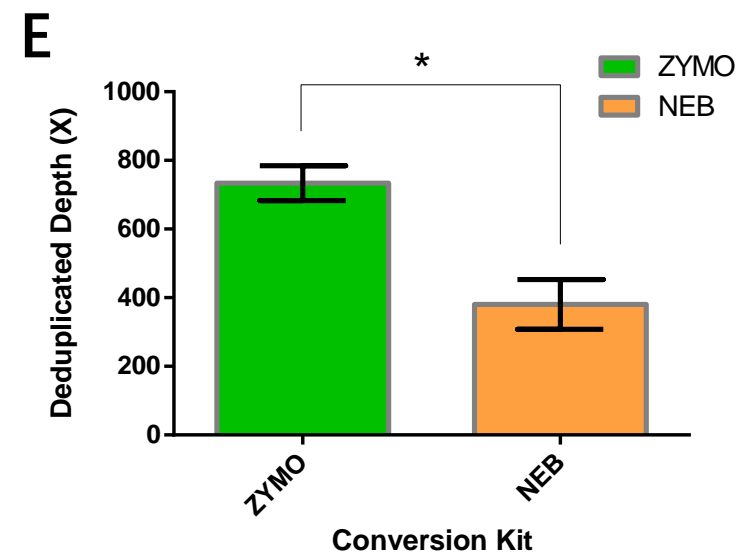

Source: https://www.biorxiv.org/content/10.1101/2022.01.12.475986v2.full.pdf
